1 **Profiling G protein-coupled receptors of *Fasciola hepatica***  
2 **identifies orphan rhodopsins unique to phylum**  
3 **Platyhelminthes**

4

5 **Short title: Profiling G protein-coupled receptors (GPCRs) in *Fasciola hepatica***

6

7 Paul McVeigh<sup>1\*</sup>, Erin McCammick<sup>1</sup>, Paul McCusker<sup>1</sup>, Duncan Wells<sup>1</sup>, Jane  
8 Hodgkinson<sup>2</sup>, Steve Paterson<sup>3</sup>, Angela Mousley<sup>1</sup>, Nikki J. Marks<sup>1</sup>, Aaron G. Maule<sup>1</sup>

9

10

11 <sup>1</sup>Parasitology & Pathogen Biology, The Institute for Global Food Security, School of  
12 Biological Sciences, Queen's University Belfast, Medical Biology Centre, 97 Lisburn  
13 Road, Belfast, BT9 7BL, UK

14

15 <sup>2</sup> Institute of Infection and Global Health, University of Liverpool, Liverpool, UK

16

17 <sup>3</sup> Institute of Integrative Biology, University of Liverpool, Liverpool, UK

18

19 \* Corresponding author

20 Email: paul.mcveigh@qub.ac.uk

21

## 22 **Abstract**

23 G protein-coupled receptors (GPCRs) are established drug targets. Despite their  
24 considerable appeal as targets for next-generation anthelmintics, poor understanding  
25 of their diversity and function in parasitic helminths has thwarted progress towards  
26 GPCR-targeted anti-parasite drugs. This study facilitates GPCR research in the liver  
27 fluke, *Fasciola hepatica*, by generating the first profile of GPCRs from the *F. hepatica*  
28 genome. Our dataset describes 146 high confidence GPCRs, representing the  
29 largest cohort of GPCRs, and the most complete set of *in silico* ligand-receptor  
30 predictions, yet reported in any parasitic helminth. All GPCRs fall within the  
31 established GRAFS nomenclature; comprising three glutamate, 135 rhodopsin, two  
32 adhesion, five frizzled and one smoothed GPCR. Stringent annotation pipelines  
33 identified 18 highly diverged rhodopsins in *F. hepatica* that maintained core  
34 rhodopsin signatures, but lacked significant similarity with non-flatworm sequences,  
35 providing a new sub-group of potential flukicide targets. These facilitated  
36 identification of a larger cohort of 76 related sequences from available flatworm  
37 genomes, representing new members of existing groups of flatworm-specific  
38 rhodopsins. These receptors imply flatworm specific GPCR functions, and/or co-  
39 evolution with unique flatworm ligands, and could facilitate development of  
40 exquisitely selective anthelmintics. Ligand binding domain sequence conservation  
41 relative to deorphanised rhodopsins enabled high confidence ligand-receptor  
42 matching of seventeen receptors activated by acetylcholine, neuropeptide F/Y,  
43 octopamine or serotonin. RNA-Seq analyses showed expression of 101 GPCRs  
44 across various developmental stages, with the majority expressed most highly in the  
45 pathogenic intra-mammalian juvenile parasites. These data identify a broad  
46 complement of GPCRs in *F. hepatica*, including rhodopsins likely to have key  
47 functions in neuromuscular control and sensory perception, as well as frizzled and  
48 adhesion families implicated, in other species, in growth, development and

49 reproduction. This catalogue of liver fluke GPCRs provides a platform for new  
50 avenues into our understanding of flatworm biology and anthelmintic discovery.

## 51 **Author Summary**

52 *Fasciola* spp. liver fluke are important veterinary pathogens with impacts on human  
53 and animal health, and food security, around the world. Liver fluke have developed  
54 resistance to most of the drugs used to treat them (flukicides). Since no vaccines  
55 exist, we need to develop new flukicides as a matter of urgency. Most anthelmintic  
56 drugs used to treat parasitic worm infections operate by impeding the functioning of  
57 their nerve and muscle. In flatworms, most nervous signals are received by a type of  
58 receptor called a G protein-coupled receptor (GPCR). Since GPCRs control  
59 important parasite functions (e.g. movement, egg-laying, feeding), they represent  
60 appealing targets for new flukicides, but have not yet been targeted as such. This  
61 work exploited the *F. hepatica* genome to determine the quantity and diversity of  
62 GPCRs in liver fluke. We found more GPCRs in the *Fasciola* genome than have  
63 been reported in any other parasitic worm. These findings provide a foundation that  
64 for researchers to determine the functions of these receptors, and which  
65 molecules/ligands they are activated by. These data will pave the way to exploring  
66 the potential of *F. hepatica* GPCRs as targets for new flukicides.

67

## 68 **Introduction**

69 *Fasciola* spp. liver fluke are pathogens of veterinary ruminants that threaten the  
70 sustainability of global meat and dairy production. Infection with *Fasciola*  
71 (fasciolosis/fascioliasis) inhibits animal productivity through liver condemnation,  
72 reduced meat and milk yields, and reduced fertility (for recent impact surveys see [1-  
73 4]. *Fasciola* spp. also infect humans, with fascioliasis considered a neglected  
74 tropical disease [5]. Anthelmintic chemotherapy currently carries the burden of fluke  
75 control, since there are no liver fluke vaccines [6]. Six flukicidal active compounds  
76 are available for general use, with on-farm resistance reported for all except  
77 oxyclozanide [7]. Resistance to the frontline flukicide, triclabendazole, also exists in  
78 human *F. hepatica* infections [8,9]. Given the absence of alternative control  
79 methods, new flukicides are essential for secure future treatment of veterinary and  
80 medical liver fluke infections.

81

82 The helminth neuromuscular system is a prime source of molecular targets for new  
83 anthelmintics [10-12], not least because many existing anthelmintics (dichlorvos,  
84 levamisole, morantel, piperazine, pyrantel, macrocyclic lactones, paraherquamide,  
85 amino acetonitrile derivatives) act upon receptors or enzymes associated with  
86 classical neurotransmission in nematodes [11] The G protein-coupled receptors  
87 (GPCRs) that transduce signals from both peptidergic and classical  
88 neurotransmitters are of broad importance to helminth neuromuscular function.  
89 Despite industry efforts to exploit helminth GPCRs in the context of anthelmintic  
90 discovery [13], only a single current anthelmintic (emodepside) has been attributed  
91 GPCR-directed activity as part of its mode of action [14-16]. GPCRs are druggable  
92 targets, since 33% of human prescription medicines are attributed a GPCR-based  
93 mode of action [17].

94

95 Despite two *F. hepatica* genomes [18,19], no GPCR sequences have been reported  
96 from *F. hepatica*. In contrast, GPCRs have been profiled in the genomes of  
97 trematodes (*Schistosoma mansoni* and *Schistosoma haematobium* [20,21]),  
98 cestodes (*Echinococcus multilocularis*, *E. granulosus*, *Taenia solium* and  
99 *Hymenolepis microstoma* [22]), and planaria (*Schmidtea mediterranea*, *Girardia*  
100 *tigrina* [21-24]). These datasets illustrated clear differences in the GPCR  
101 complements of individual flatworm classes and species, with reduced complements  
102 in parasitic flatworms compared to planarians.

103

104 This study profiles the GPCR complement of the temperate liver fluke *F. hepatica* for  
105 the first time, permitting comparisons with previously characterised species that  
106 inform evolutionarily and functionally conserved elements of flatworm GPCR  
107 signalling. We have identified and classified 146 GPCRs by GRAFS family  
108 (glutamate, rhodopsin, adhesion, frizzled, secretin) assignment [25], the majority of  
109 which are expressed in *Fasciola* RNA-Seq datasets. These include clear  
110 orthologues of GPCRs activated by known neurotransmitters, within which we  
111 performed the deepest *in silico* ligand-receptor matching analyses to date for any  
112 parasitic helminth. The latter predicted ligands for 17 *F. hepatica* GPCRs,  
113 designating these as primary targets for deorphanisation. Intriguingly, the dataset  
114 included a set of flatworm-expanded GPCRs lacking orthologues outside of phylum  
115 Platyhelminthes. Evolution of such GPCRs across the parasitic flatworm classes  
116 may have been driven by flatworm-specific functional requirements or co-evolution  
117 with flatworm ligands, either of which could help support novel anthelmintic  
118 discovery. This dataset provides the first description of GPCRs in liver fluke, laying a  
119 foundation for future advances in GPCR-directed functional genomics and flukicide  
120 discovery.

121

## 122 **Results and Discussion**

### 123 **A first look at GPCRs in the *F. hepatica* genome**

124 This study represents the first description of the GPCR complement of the temperate  
125 liver fluke, *F. hepatica*. Using HMM-led methods to examine available *F. hepatica*  
126 genome datasets, we identified 166 GPCR-like sequences in *F. hepatica* (Figure 1,  
127 S1 Table). Figure 1B shows that 49.7% contained 7 TM domains, with 88% of  
128 sequences containing at least four TMs. The remainder of this manuscript focuses  
129 on 146 sequences containing  $\geq 4$  TM domains (S1 Table; S2 Text). Twenty  
130 sequences containing  $\leq 3$  TMs were analysed no further (Figure 1).

131

132 Our  $\geq 4$  TM dataset (146 sequences) was comprised of three glutamate, 135  
133 rhodopsin, two adhesion, five frizzled, and one smoothed GPCR. Sequence  
134 coverage was generally good in terms of TM and extracellular domain  
135 representation, so we did not attempt to extend truncated sequences into full-length  
136 receptors. The overall dataset contained excellent representation of seven TM  
137 domains, while N-terminal extracellular LBDs and cysteine-rich domains (CRD) were  
138 also detected (in glutamate, frizzled/smoothed, adhesion families). However, we  
139 could not identify N-terminal secretory signal peptides in any sequence, suggesting  
140 incomplete sequence coverage at extreme N-termini. Rhodopsins are designated by  
141 ubiquitously conserved motifs on TMs 2, 3, 6 and 7. All rhodopsin sequences  
142 contained at least one of these motifs (Figure 2, S3 Table), including in the highly  
143 diverged flatworm-specific rhodopsins described below.

144

145 Table 1 compares the *F. hepatica* GPCR complement with other flatworms,  
146 illustrating that *F. hepatica* has the largest GPCR complement reported from any  
147 parasitic flatworm to date. The bulk of the expansion involves rhodopsins, while the  
148 other GRAFS families are comparable between *F. hepatica* and other flatworm

149 parasites. Secretin is the notable exception, at least one of which has been identified  
 150 in every other species studied, but which was absent from the datasets scrutinized  
 151 here.

152

153 **Table 1. Comparison of the *Fasciola hepatica* G-protein coupled receptor**  
 154 **(GPCR) complement with those reported from other flatworms.** Species  
 155 complements are shown in the context of GRAFS nomenclature [25]. \* Saberi et al  
 156 [24] described 566 GPCRs in *Schmidtea mediterranea*, of which 516 fall within  
 157 GRAFS nomenclature.  
 158

|                   | <i>F. hepatica</i> | <i>S. mansoni</i> <sup>[21]</sup> | <i>S. mansoni</i> <sup>[20]</sup> | <i>S. haematobium</i> <sup>[20]</sup> | <i>E. multilocularis</i> <sup>[22]</sup> | <i>S. mediterranea</i> <sup>[21]</sup> | <i>S. mediterranea</i> <sup>[24]</sup> |
|-------------------|--------------------|-----------------------------------|-----------------------------------|---------------------------------------|------------------------------------------|----------------------------------------|----------------------------------------|
| Glutamate         | 3                  | 2                                 | 2                                 | 2                                     | 5                                        | 9                                      | 11                                     |
| Rhodopsin         | 135                | 105                               | 59                                | 53                                    | 48                                       | 418                                    | 461                                    |
| Adhesion          | 2                  | 3                                 | -                                 | -                                     | 4                                        | 9                                      | 14                                     |
| Frizzled/Smoothed | 6                  | 5                                 | 4                                 | 4                                     | 5                                        | 11                                     | 10                                     |
| Secretin          | 0                  | 2                                 | 5                                 | 5                                     | 1                                        | 1                                      | 20                                     |
| <b>Total</b>      | <b>146</b>         | <b>117</b>                        | <b>64</b>                         | <b>64</b>                             | <b>83</b>                                | <b>448</b>                             | <b>516*</b>                            |

167

168 **Stringent annotation of flatworm-specific orphan rhodopsin GPCRs in *F.***  
 169 ***hepatica***

170 Encompassing 135 sequences, the rhodopsin family is the largest of the GRAFS  
 171 classifications in *F. hepatica*. Rhodopsins comprise four subfamilies ( $\alpha$ ,  $\beta$ ,  $\gamma$  and  $\delta$ )  
 172 [26]; we identified members of both  $\alpha$  and  $\beta$  groups, with nucleotide-activated (P2Y)  
 173 receptors ( $\gamma$  group), and olfactory ( $\delta$  group) receptors absent from our dataset  
 174 (Figures 1, 2; S1 Table). The *F. hepatica*  $\alpha$  subfamily contained 38 amine receptors  
 175 and three opsins, with the  $\beta$  subfamily comprised of at least 47 peptide receptors.  
 176 Homology-based annotations were supported by an ML phylogeny (Figure 2A),  
 177 which clearly delineated between amine and opsin  $\alpha$  clades, and the peptide-  
 178 activated  $\beta$ -rhodopsin clades. Amine and peptide receptors were further delineated



179 by additional phylogenetic and structural analyses, permitting high-confidence  
180 assignment of putative ligands to 16 GPCRs (see below).  
181  
182 Six clades contain an additional 44 rhodopsin sequences with low scoring (median E  
183 =  $5.6e^{-5}$ ) similarity matches to a range of disparate  $\alpha$  and  $\beta$  rhodopsins. Due to the  
184 subsequent difficulty in designating these clades as amine, peptide or opsin, we  
185 labelled them orphan rhodopsins (“R” clades in Figure 2A). Eighteen GPCRs within  
186 the orphan clades displayed exceptionally low similarity scores relative to non-  
187 flatworm sequences (Figure 2A,B). Seven returned no-significant hits in BLASTp  
188 searches against non-flatworm members of the ncbi nr dataset (the most diverse  
189 sequence dataset available to the research community), and the remaining eleven  
190 scored  $E > 0.01$ . Domain analysis (InterPro) identified rhodopsin domains  
191 (IPR000276 or IPR019430) in thirteen of these (S1 Table, S3 Table), confirming their  
192 identity as rhodopsin-like GPCRs. More troublesome to classify were five that, in  
193 addition to lacking significant BLASTp identity to non-flatworm sequences, also  
194 lacked any identifiable protein domains/motifs (with the exception of TM domains).  
195 We annotated these as rhodopsins because: (i) They did not contain motifs/domains  
196 representative of any other protein family; (ii) They displayed topological similarity to  
197 GPCRs (ten had seven TM domains, seven had six TMs, one had five TM domains);  
198 (iii) They contained at least two of the conserved rhodopsin motifs in TM domains 2,  
199 3, 6 and 7 similar to those seen in the rest of the *F. hepatica* rhodopsins (Figure 2C;  
200 S4 Table). As highly diverged rhodopsins with little or no sequence similarity versus  
201 host species, these 18 *F. hepatica* receptors have obvious appeal as potential  
202 targets for flukicidal compounds with exquisite selectivity for parasite receptors over  
203 those of the host. This potential is contingent on future work demonstrating essential  
204 functionality for these receptors; showing their wider expression across flatworm  
205 parasites would enable consideration of anthelmintics with multi-species activity. To

206 investigate the latter question, we used BLASTp to search the 18 *F. hepatica*  
207 rhodopsins against other available genomes representing phylum Platyhelminthes.  
208  
209 **An orphan family of lineage-expanded rhodopsins in flatworm genomes**  
210 Although lacking similarity against non-flatworm datasets, each of the 18 lineage-  
211 expanded *F. hepatica* rhodopsins returned high-scoring hits in BLASTp searches  
212 against the genomes of other flatworms (WormBase Parasite release WBPS9). All  
213 returns were subsequently filtered through a stringent five-step pipeline (Figure 3A)  
214 consisting of: (i) Removal of duplicate sequences; (ii) Exclusion of sequences  
215 containing fewer than four TM domains; (iii) A requirement for reciprocal BLASTp  
216 against the *F. hepatica* genome to return a top hit scoring  $E < 0.001$  to one of the  
217 original 18 *F. hepatica* queries; (iv) A requirement for BLASTp against ncbi nr non  
218 flatworm sequences to return a top hit scoring  $E > 0.01$ ; (v) Removal of sequences  
219 lacking conservation of the ubiquitous rhodopsin motifs seen in the divergent *F.*  
220 *hepatica* rhodopsins (Figures 2C, 3C). The latter motifs were largely absent from  
221 cestode rhodopsins (with the exception of a single sequence from *Diphyllobothrium*  
222 *latum*, and three sequences from *Schistocephalus solidus*), and present in only two  
223 sequences from a single monogenean (*Protopolystoma xenopodis*). This left our  
224 final dataset consisting of 76 “flatworm-specific” rhodopsins (fwRhods; Figure 3B,  
225 Table S4) in phylum Platyhelminthes, heavily biased towards trematodes (70  
226 sequences). Nineteen sequences from nine species of cestode were omitted from  
227 the final dataset despite meeting the inclusion criteria in most respects, because they  
228 lacked conservation of ubiquitous rhodopsin motifs (filtering step (v)). Although their  
229 further characterisation was beyond the scope of this study, they warrant more  
230 detailed examination in future studies as potential cestode-specific rhodopsins. Note  
231 that our filtering pipeline also excluded initial hits from *Gyrodactylus salaris*  
232 (Monogenea), and the Turbellarians *Macrostomum lignano* and *S. mediterranea*.  
233 Individual species complements of fwRhods showed some consistency (Figure 3B);

234 the trematodes *F. hepatica* and *Echinostoma caproni* (both phylum Platyhelminthes  
235 Order Echinostomida) bore 18 and 19 sequences, respectively, most species of  
236 family Schistosomatidae contained 3-4 sequences each. The inclusion of two  
237 cestode species and a single monogenean may be an indication of the existence of  
238 distantly related rhodopsins in those lineages, rather than a true measure of the  
239 extent of cestode and monogenean fwRhod diversity. Again, proper classification of  
240 these groups will require further more focused study that was beyond the scope of  
241 the current work.

242

243 Our method for identification of fwRhods is supported by a similar BLAST-driven  
244 approach used to identify highly diverged “hidden orthologues” in flatworms [27]. It  
245 should be noted that the existence of sequences lacking sequence similarity to  
246 genes of other species is not a new finding. “Taxonomically-restricted genes”  
247 comprise 10-20% of every sequenced eukaryote genome, and may be essential for  
248 phylum-specific morphological and molecular diversity [28]. How do our fwRhods  
249 compare to previously reported groups of flatworm restricted GPCRs in *S. mansoni*,  
250 *S. mediterranea* and *E. granulosus* [21,22,24]? Phylogenetic comparisons of these  
251 groups (Figure 3D) demonstrated that the previously described *Schmidtea* Srfb  
252 cluster [24] and the PROF1 clade (*E. multilocularis*, *Schmidtea*, *S. mansoni* [21]) are  
253 equivalent, and likely represent a single group. Our phylogeny added 23 fwRhods to  
254 this clade, including three from *F. hepatica* (BN1106\_s6156B000040, D915\_03083,  
255 D915\_13002). Figure 3D designated the remaining fwRhods within additional pre-  
256 existing groups [24], placing 34 within Rho-L (including eight from *F. hepatica*), nine  
257 in Srfc (one from *F. hepatica*), four in Rho-R (one from *F. hepatica*) and two in Srfa  
258 (one from *F. hepatica*). Four fwRhod sequences were omitted from this tree due to  
259 poor alignment.

260

261 Our approach to classifying flatworm-restricted rhodopsins was to err towards  
262 stringency, and this may have resulted in erroneous exclusion of some sequences  
263 from the dataset. There is no set definition for lineage specificity in the literature, but  
264 ours is the most stringent yet applied to flatworm GPCRs. Applying our BLASTp  
265  $E \geq 0.01$  cutoff (modified from Pearson [29]) to the previously described groups of  
266 flatworm-specific rhodopsins [21,22,24], excludes 57 of the 62 PROF1s described  
267 from *S. mansoni* and *S. mediterranea* and 287 of the 318 RhoL/R and SrfA/b/c  
268 flatworm-specific clusters in *S. mediterranea*. Further pursuit of the extent of lineage  
269 restricted GPCRs in the wider phylum was beyond the scope of this study, but we  
270 are currently trawling for taxonomically restricted flatworm GPCRs on a phylum wide  
271 scale.

272

273 We have established the existence of a group of rhodopsin GPCRs that appear  
274 restricted to, and expanded in, phylum Platyhelminthes. By definition these  
275 receptors are orphan (i.e. their native ligands are unknown), so key experiments  
276 must focus on identifying their ligands and functions. Such experiments can exploit  
277 the expanding molecular toolbox for flatworm parasites, which in *F. hepatica* includes  
278 RNA interference (RNAi) [30-33], interfaced with enhanced in vitro maintenance  
279 methods, and motility, growth/development and survival assays [31,34,35]. Our  
280 phylogeny (Figure 2A) suggests that fwRhods are more similar to peptide than amine  
281 receptors. If their heterologous expression can be achieved, one approach to  
282 characterisation would be to screen them with the growing canon of peptide ligands  
283 from flatworms [36-38], as well as from other genera, in a receptor activation assay.  
284 Subsequent localisation of their spatial expression patterns would provide additional  
285 data that would inform function.

286

287 **Predicting ligands for *F. hepatica* rhodopsin GPCRs**

288 In addition to the flatworm-specific fwRhod sequences described above, for which  
289 the ligands and functions remain cryptic, we also identified many rhodopsins with  
290 clear similarity to previously annotated GPCRs. Figure 2A shows the phylogenetic  
291 delineation of these sequences into amine-, opsin- and peptide-like receptors,  
292 distinctions that are supported by BLASTp comparisons with general (ncbi nr) and  
293 lineage-specific (superphylum level) datasets, as well as by gross domain structure  
294 (InterProScan) (S1 Table). These data provided a foundation for deeper  
295 classification of putative ligand-receptor matches.

296

297 The structure and function of GPCR LBDs can be studied using molecular modelling  
298 to predict interactions with receptor-bound ligands. These predictions can then be  
299 validated by targeted mutagenesis of residues within the LBD, measuring impacts  
300 with downstream signalling assays. Such experiments have been performed in  
301 model vertebrates and invertebrates, enabling identification of evolutionarily  
302 conserved binding residues/motifs. These data inform assignment of putative  
303 ligands to newly discovered receptors. Since mutagenesis experiments have not yet  
304 been performed in flatworm GPCRs, we employed a comparative approach to  
305 identify 17 *F. hepatica* rhodopsins with LBD motifs diagnostic of receptors for NPF/Y,  
306 5-HT, octopamine (Oct) or acetylcholine (ACh) (Figure 4; S4 Table), thus enabling *in*  
307 *silico* ligand-receptor matching of these GPCRs.

308

309 Comparison of *F. hepatica* rhodopsins by structural alignment with LBD residues  
310 conserved across vertebrate NPY and dipteran NPF receptors [39-44] identified  
311 three peptide receptors with more than 75% identity across 9 ligand-interacting  
312 positions (Figure 4A). The two highest scoring GPCRs (BN1106\_s3169B000088  
313 and D915\_05685) are also found, in our phylogenetic analysis (S5 Figure) in the  
314 same clade as the deorphanized NPF/Y receptors of human (HsNPYR2), *Glossina*  
315 *mortisans* (Glomo-NPFR) and *S. mediterranea* (SmedNPYR1). These data

316 designate these three *F. hepatica* GPCRs as prime candidates for further work to  
317 deorphanize and confirm these receptors as NPF/Y-activated, and to probe the  
318 biology of NPF/Y receptors in parasitic flatworms. A single NPF/Y receptor has been  
319 functionally characterised in *S. mediterranea*, displaying a role in the maintenance of  
320 sexual maturity [24]. If related functions are conserved in liver fluke NPF/Y receptors  
321 they could have appeal as therapeutic targets in adult fluke that could interrupt  
322 parasite transmission, although their utility for the control of acute fasciolosis, caused  
323 by migrating juveniles, would be open to question.

324

325 Broad phylogenetic comparison of our peptide receptor set with a comprehensive  
326 collection of deorphanized bilaterian rhodopsin GPCRs (S5 Figure), identified *F.*  
327 *hepatica* receptors similar to those for myomodulin, FLP, luqin and Neuropeptide KY  
328 (NKY). These ligands have all been predicted or demonstrated in previous  
329 biochemical or in silico studies of flatworm neuropeptides [36-38]. We also  
330 uncovered *F. hepatica* GPCRs with phylogenetic similarity to allatotropin, allatostatin,  
331 thyrotropin-releasing hormone and sex peptide receptors. These ligands have not  
332 yet been reported in flatworms, although the existence of allatostatin-like receptors in  
333 flatworms is supported by the inter-phyla activity of arthropod allatostatins in  
334 helminth (including flatworm) neuromuscular assays [45].

335

336 No *F. hepatica* neuropeptide sequences have been published yet, but our  
337 unpublished data suggest the presence of at least 36 neuropeptide genes in the *F.*  
338 *hepatica* genome (Duncan Wells, Queen's University Belfast, personal  
339 communication). These ligands would facilitate deorphanisation of heterologously-  
340 expressed peptide GPCRs (S1 Table). This is essential work, since although two  
341 planarian peptide receptors have been deorphanised [23,24], no flatworm parasite  
342 peptide GPCRs have been ligand matched yet. Receptor deorphanisation provides  
343 a starting point for drug discovery, by enabling development of agonists or

344 antagonists that modulate the interaction of a GPCR with its cognate ligand. Such  
345 compounds could form the basis of ligand series for screening pipelines that would  
346 lead to new flukicides [46,47].  
347  
348 Serotonin (5-hydroxytryptamine, 5-HT) is abundant throughout flatworm nervous  
349 systems, and is considered the primary flatworm excitatory neurotransmitter [48].  
350 Deorphanized GPCRs activated by 5-HT have been described in turbellarians and  
351 trematodes, with an *S. mansoni* 5-HT receptor (Sm5HTR) involved in neuromuscular  
352 control [49-51]. Five *F. hepatica* rhodopsins (Figure 4B) bore appreciable ( $\geq 80\%$ )  
353 positional identity in amino acids shown to be key ligand-interacting residues in the  
354 human 5HT1A LBD [52,53]. Notably, these residues were also conserved in the  
355 deorphanized *S. mansoni* 5-HT receptor (Sm5HTR, Smp\_126730) [51]. Three of the  
356 sequences (BN1106\_s362B000177, BN1106\_s81B000700 and  
357 BN1106\_s10B000515) also resembled Sm5HTR in our phylogenetic analysis,  
358 identifying them as likely 5-HT receptors. The remaining two (D915\_00277 and  
359 BN1106\_s1436B000114) appeared phylogenetically more similar to an *S. mansoni*  
360 dopamine receptor (Smp\_127310) [54]. These annotations provide rational starting  
361 points for receptor deorphanization using functional genomic and/or heterologous  
362 expression tools. We found that *F. hepatica* dopamine-like receptors, identified by  
363 phylogeny (S5 Figure), displayed poor conservation (max 56% overall identity) to the  
364 human D2 LBD [55]. Due to this lack of selectivity, we did not annotate any *F.*  
365 *hepatica* GPCRs as dopamine receptors.  
366  
367 Although common in other invertebrates, octopamine has not yet been directly  
368 demonstrated as a neurotransmitter in flatworms. Evidence for its presence is  
369 indirect, based on tyramine  $\beta$ -hydroxylase (octopamine's biosynthetic enzyme)  
370 activity in cestodes and planaria [56,57]. Three rhodopsins (Figure 4C) showed  
371 100% conservation of the arthropod octopamine LBD, as determined from

372 *Periplaneta americana* and *Bombyx mori* [58,59], with an additional four showing  
373 88% conservation. Of these seven rhodopsins, four resolved in close phylogenetic  
374 proximity to *Drosophila* mushroom body octopamine receptors (D915\_02972),  
375 *Drosophila* octopamine beta-receptors (D915\_08505 and BN1106\_s1016B000108)  
376 (S5 Figure) or a *Drosophila* tyramine receptor (D915\_05578), denoting these as  
377 high-confidence octopamine receptors. These data provide further evidence in  
378 support of a functional role for this enigmatic classical neurotransmitter in flatworms.  
379  
380 Acetylcholine has species-specific impacts on flatworm neuromuscular preparations  
381 *in vitro*, with myoinhibitory effects in *Fasciola* [60]. Two putative muscarinic  
382 acetylcholine receptors (mAChRs), shared highest LBD identity with a Rat M3 ACh  
383 receptor (Figure 4D) [61]. Although these were only 67% identical to the rat  
384 sequence, the five ligand-interacting residues within their LBDs were 100% identical  
385 to those of a deorphanised *S. mansoni* mAChR, known to be involved in  
386 neuromuscular coordination (SmGAR) [62]. These receptors (D915\_00814 and  
387 BN1106\_s1913B000092) were also the most similar to SmGAR in our phylogeny (S5  
388 Figure) so we consider them amongst our high confidence candidates for  
389 deorphanization.

390

### 391 ***F. hepatica* glutamate receptors bear divergent glutamate binding domains**

392 At least three glutamate-like GPCRs exist in *F. hepatica* (Figure 5A, S1 Table). All  
393 three are defined by significant BLASTp similarity (median  $E=2.3e^{-34}$ ) to metabotropic  
394 glutamate receptors (mGluRs), and/or by the presence of InterPro GPCR family 3  
395 (Class C) domains IPR017978, IPR000162 or IPR000337. Phylogenetic analysis of  
396 these GPCRs was performed alongside receptors representative of the various Class  
397 C subgroups (Figure 5) [63], including  $Ca^{2+}$ -sensing receptors,  $\gamma$ -aminobutyric acid  
398 type B (GABA<sub>B</sub>) receptors, metabotropic glutamate (mGluR) receptors, and  
399 vertebrate taste receptors; for reference we also included the two previously reported



400 mGluRs from *S. mansoni* [21]. One *F. hepatica* GPCR (BN1106\_s2924B000081)  
401 resolved alongside Smp\_052680, which has previously been described as an *S.*  
402 *mansoni* mGluR; these receptors form a close outgroup from the mGluR clade,  
403 supporting their designation as mGluRs. A second *F. hepatica* glutamate receptor  
404 (BN1106\_s1717B000113) also has a close *S. mansoni* ortholog (Smp\_128940), both  
405 of which reside in an orphan outgroup that is of uncertain provenance. The third *F.*  
406 *hepatica* glutamate receptor resides within another orphan group, close to human  
407 GPR158 and GPR179, two closely related class C GPCRs expressed respectively in  
408 the human brain and retina [64]. Although these receptors have been linked with  
409 specific disease states [65,66], their ligands remain unknown.

410

411 Divergence within the LBD can inform the ligand selectivity of Class C receptors  
412 [21,67]. To further classify the two orphan glutamate GPCRs described above, we  
413 generated multiple sequence alignments to analyse the conservation of established  
414 agonist-interacting residues between mammalian mGluR and GABA<sub>B</sub> receptors and  
415 our *F. hepatica* GPCRs. These analyses identified no significant conservation of  
416 either mGluR or GABA<sub>B</sub> LBD residues (Figure 6B). Figure 6B also includes the  
417 previously reported *S. mansoni* glutamate receptors [21], where Smp\_052660  
418 contained a relatively well-conserved LBD with Smp\_062660 appearing more  
419 atypical. Since all three *F. hepatica* glutamate GPCRs bear atypical LBDs with  
420 respect to both GABA<sub>B</sub> and mGluR, it remains difficult to unequivocally define their  
421 ligand selectivity on the basis of conserved motifs. Nevertheless, the lack of *in silico*  
422 evidence for *F. hepatica* GABA<sub>B</sub> GPCRs reflects the dominance of GABA<sub>A</sub>-like  
423 pharmacology, which suggests that flatworm GABA signal transduction is probably  
424 entirely mediated by ionotropic receptors [48,68].

425

426 **The Wnt binding domain is conserved in *F. hepatica* frizzled/smoothened**  
427 **receptors**

428 Ten frizzled (*fzd*) GPCRs and a single smoothened (*smo*) GPCR are recognised in  
429 the human genome. In *F. hepatica* we identified five *fzd*-like sequences and one  
430 *smo*-like sequence (Figure 6; Table S1; Table S7). All of these show high scoring  
431 similarity to annotated sequences in the ncbi nr dataset (median  $E=3.8e^{-83}$ ), and all  
432 five *fzd* contain InterPro domain IPR000539, with the single *smo* containing domain  
433 IPR026544 (Table S1). Phylogenetic analysis of these alongside vertebrate and  
434 invertebrate receptors placed all in close proximity to existing *fzd*/*smo* groups (Figure  
435 6A). Four *F. hepatica* *fzd* had individual direct orthologs with the four known *S.*  
436 *mansoni* *fzd* [21].

437

438 *Frizzled* receptors are activated by cysteine-rich glycoprotein ligands known as Wnts  
439 (Wingless and Int-1), and are involved in developmental signalling through at least  
440 three different signalling pathways [69]. Crystallography of mouse *fz8*, docked with  
441 *Xenopus wnt8*, identified 14 amino acids within the *fz8* CRD that make contact with  
442 the Wnt8 ligand [69]. Positional conservation of these residues is apparent when *fz8*  
443 is aligned with the five *F. hepatica* *fzd* sequences (Figure 6B; S6 Table), suggesting  
444 conservation of the wnt-frizzled interaction between liver fluke and vertebrates.

445

446 Two Wnt ligands have been described in *S. mansoni* [70,71]; our BLAST searches  
447 identified at least three Wnt-like sequences in the *F. hepatica* genome  
448 (BN1106\_s198B000330.mRNA-1, BN1106\_s1256B000163.mRNA-1,  
449 BN1106\_s737B000430.mRNA-1; Figure 6C). These showed conservation of the 23  
450 conserved cysteine residues that are diagnostic of Wnt glycoproteins [72]. Norrin, a  
451 non-Wnt protein ligand, can also activate Fz4, and the canonical  $\beta$ -catenin pathway.  
452 The amino acids involved in norrin binding to the *fz4* CRD have also been  
453 determined [73], but we did not observe conservation of these in any of the *F.*  
454 *hepatica* *fzd*. Similarly, BLASTp searches of human norrin (Uniprot Q00604) against  
455 the *F. hepatica* genome did not return significant hits, suggesting that the norrin-fz

456 signaling axis may not function in liver fluke. Smoothened receptors are structurally  
457 similar to frizzleds, but operate in a ligand-independent fashion within hedgehog  
458 signaling pathways that control several developmental processes [74]. Model  
459 organism genomes typically contain only one smoothened gene (SMO); this was the  
460 case in *S. mansoni* and *S. mediterranea* [21], and here we have identified a single *F.*  
461 *hepatica* smoothened (BN1106\_s1509B000194 ; Figure 6; Table S1).

462

463 Fzd/smo GPCRs are involved broadly in the control of cellular development. Our  
464 discovery of fzd/smo GPCRs, and their Wnt ligands, in *F. hepatica* opens avenues  
465 towards probing molecular aspects of development and differentiation in the putative  
466 stem cells/neoblasts of liver fluke [35]. Neoblasts are the cells that impart the  
467 regenerative capacity of free-living turbellarian flatworms [75], and neoblast-like cells  
468 also represent the only proliferating cells in several parasitic species [76-78].

469 Therefore, these cells are important in understanding fundamental fluke biology and  
470 represent potential repositories of unique anthelmintic targets, capable of inhibiting  
471 worm growth or development. The presence of both receptor and ligand sequences  
472 will permit functional genomic dissection of Wnt-Frizzled ligand-receptor signalling  
473 networks, aimed at elucidating their roles in the development and differentiation of  
474 liver fluke neoblast- like cells. These FhGPCRs will enable comparisons between  
475 the biology of parasitic and free-living flatworms, where Wnt signaling is known to be  
476 essential for anterior-posterior polarity in regenerating planaria [79,80].

477

#### 478 **Class B (Adhesion and Secretin) receptors**

479 Class B receptors incorporate both adhesions and secretins. Adhesions are  
480 characterised by a long N-terminal extracellular domain (ECD) that includes several  
481 functional motifs. These ECDs are auto-proteolytically cleaved into two subunits that  
482 subsequently reassemble into a functional dimer [26]. We identified two Class B  
483 sequences in the *F. hepatica* genome (S7 Figure, S1 Table), both of which

484 (scaffold181\_78723-79604, and BN1106\_s537B000355) contained GPCR class B  
485 InterPro domain IPR000832 and displayed closest BLASTp similarity ( $E=5.6e^{-7}$ ) to  
486 latrophilin-like receptors. These data suggest that both are adhesions, rather than  
487 secretins. Phylogenetic analysis of these GPCRs alongside human Class B  
488 receptors supports the definition of scaffold181\_78723-79604 as an adhesion,  
489 alongside two previously reported *S. mansoni* adhesions (Smp\_176830,  
490 Smp\_099670) [21], while the other receptor appears more divergent.  
491 BN1106\_s536B000355 pairs with another known *S. mansoni* adhesion  
492 (Smp\_058380) [21], although both sit in closer proximity to human secretins than  
493 adhesions.

494

495 Deorphanization of a handful of adhesions matches them with a complex assortment  
496 of ligands including collagen, transmembrane glycoproteins, complement proteins  
497 and FMRFamide-like neuropeptides [81]. This assortment of potential ligands, and  
498 their expression in almost every organ system has led to the proposal of a diverse  
499 range of functions for vertebrate adhesions. The *F. hepatica* adhesion complement  
500 of two GPCRs is greatly reduced compared to the 33 receptors known in humans; in  
501 other flatworms 14, 4 and 1 adhesions have been described in *S. mediterranea*, *E.*  
502 *multilocularis* and *S. mansoni*, respectively [21,22,24]. Functional characterisation  
503 will be a challenging task given the wide range of possible functions to be assayed;  
504 an appealing starting point would be to investigate roles in neoblast motility prior to  
505 differentiation, given that mammalian adhesion GPCRs are involved in the control of  
506 cellular migration [81].

507

### 508 **Developmental expression**

509 Using RNA-Seq methods, we were able to confirm expression of 101 GPCRs across  
510 libraries representing several *F. hepatica* life-stages. These datasets included  
511 publically available reads from individual developmental stages [18], and a

512 transcriptome that we generated in-house for 21-day liver stage ex-vivo juveniles  
513 (juv2). Since these datasets were generated independently and clearly display  
514 distinct sequence diversities, we avoided any further direct comparisons between  
515 Cwiklinski juv1 and our juv2 datasets. Each dataset is analysed separately, below.  
516  
517 Figure 7A illustrates detection of 83 GPCRs across Cwiklinski's developmentally  
518 staged RNA-Seq datasets. These comprised four FZD, thirteen aminergic  
519 rhodopsins, two opsins, 41 peptidergic rhodopsins, and 23 orphan rhodopsins. The  
520 latter included nine fwRhods. Clustering within Figure 7A's expression heatmap  
521 shows clear developmental regulation of GPCR expression, outlining nine GPCRs  
522 with relatively higher expression in adults, two with higher expression in 21d  
523 juveniles, 64 GPCRs preferentially expressed in either 1h, 3h or 24h NEJs, and six  
524 receptors expressed most highly in eggs. GPCR classes appear to be randomly  
525 distributed across these expression clusters, giving little opportunity to infer function  
526 from expression. Adult-expressed GPCRs include five orphan fwRhods, three  
527 peptide receptors including a putative NPF/Y receptor, and a predicted octopamine-  
528 gated aminergic rhodopsin. The majority of expressed GPCRs occurred in the NEJ-  
529 focused expression cluster. Given data implicating GPCRs in motility,  
530 growth/development and sensory perception [11], it is no surprise to find high levels  
531 of GPCR expression in the NEJs, which must navigate and burrow their way from the  
532 gut lumen into the liver parenchyma, while also sustaining rapid growth from the start  
533 of the infection process. The high expression in these stages, of receptors that we  
534 predict to be activated by myomodulators such as ACh, FMRFamide, GYIRFamide,  
535 myomodulin, myosuppressin and 5-HT, provide tentative support for these  
536 predictions. The focused expression of six GPCRs in eggs suggests potential roles  
537 in the control of cellular proliferation and fate determination processes that occur  
538 during embryonation of liver fluke eggs. This complement did not include frizzled or  
539 adhesion GPCRs that are traditionally implicated in the control of development,

540 instead consisting of rhodopsins (including an angiotensin-like peptide receptor, two  
541 octopamine-like amine receptors, one opsin receptor and one fwRhod receptor).  
542  
543 Focusing on the pathogenic 21-day juvenile stage, we detected 76 GPCRs in our  
544 juv2 datasets, and 29 in the corresponding juv1 samples from Cwiklinski's dataset  
545 (Figure 7B). Our juv2 dataset included three glutamate, one adhesion, four frizzled,  
546 one smoothed, and 67 rhodopsins. The identity of the receptors expressed here  
547 again attest to the key role of neuromuscular co-ordination in this highly motile life  
548 stage, which must penetrate and migrate through the liver parenchyma *en route* to  
549 the bile ducts. Amongst the receptors expressed in this stage and thought to have a  
550 role in neuromuscular function are several activated by classical neurotransmitters  
551 including ACh, dopamine and 5-HT. The peptide receptors include some with  
552 phylogenetic similarity to receptors for myoactive flatworm peptides (FMRFamide,  
553 GYIRFamide, NPF) [11], as well as receptors from other invertebrates activated by  
554 peptide ligands known to have excitatory effects on flatworms (allatostatin A,  
555 myomodulin, proctolin) [82]. The presence of highly expressed GPCRs with  
556 probable neuromuscular functions in liver stage juveniles, points to the importance of  
557 studying these receptors with a view to flukicide discovery. The damage caused by  
558 migrating juvenile fluke requires that new flukicides are effective against this stage.  
559 The neuromuscular GPCRs expressed in migrating juveniles provide compelling  
560 targets for new drugs.

561

## 562 **Conclusions**

563 GPCRs are targets for 33% of human pharmaceuticals [17], illustrating the appeal of  
564 GPCRs as putative anthelmintic targets. This study provides the first description of  
565 the *F. hepatica* GPCR complement permitting consideration of a GPCR target-based  
566 screening approach to flukicide discovery. To facilitate the deorphanization  
567 experiments that will precede compound screening efforts, we have described a set

568 of high confidence rhodopsin ligand-receptor pairs. We identified these GPCRs,  
569 including receptors for ACh, octopamine, 5HT and NPF/Y, through phylogenetic  
570 comparison with existing deorphanised receptors and positional conservation of  
571 ligand-interacting residues within ligand binding domains. Our additional descriptions  
572 of flatworm-specific rhodopsins support the potential for synthetic ligands to be  
573 parasite-selective anthelmintics.  
574

## 575 **Materials and Methods**

### 576 **Liver fluke sequence databases**

577 We exploited two *F. hepatica* genome assemblies available from WormBase  
578 ParaSite [83], generated by Liverpool University  
579 ([http://parasite.wormbase.org/Fasciola\\_hepatica\\_prjeb6687/Info/Index/](http://parasite.wormbase.org/Fasciola_hepatica_prjeb6687/Info/Index/); [18], and  
580 Washington University, St Louis  
581 ([http://parasite.wormbase.org/Fasciola\\_hepatica\\_prjna179522/Info/Index/](http://parasite.wormbase.org/Fasciola_hepatica_prjna179522/Info/Index/); [19].

582

### 583 **Identification of GPCR-like sequences from *F. hepatica***

584 Figure 1 summarises our GPCR discovery methodology, which employed Hidden  
585 Markov Models (HMMs) constructed from protein multiple sequence alignments  
586 (MSAs) of previously described *S. mansoni* and *S. mediterranea* GPCR sequences  
587 [21]. Individual HMMs were constructed for each GRAFS family [25]. Alignments  
588 were generated in Mega v7 ([www.megasoftware.net](http://www.megasoftware.net)) [84] using the Muscle algorithm  
589 with default parameters. HMMER v3 (<http://hmmer.org>) was employed to construct  
590 family-specific HMMs (*hmmbuild*) from alignments and these were searched  
591 (*hmmsearch*) against a predicted protein dataset from *F. hepatica* genome  
592 PRJEB6687 consisting of 33,454 sequences [18]. Returned sequences were filtered  
593 for duplicates and ordered relative to the *hmmsearch* scoring system, enabling the  
594 classification of hits according to the GRAFS family to which they showed most  
595 similarity (i.e. highest score, lowest E value). All remaining returns were then used  
596 as BLAST queries (BLASTp and tBLASTn) to identify matching, or additional,  
597 sequences originating from the PRJEB6687 and PRJNA179522 genomes (Figure 1).  
598 Where sequences appeared in both genomes, we kept the longest annotated  
599 sequence (S1 Table).

600

### 601 **GPCR annotation**



602 Sequences resulting from HMM searches were filtered by transmembrane (TM)  
603 domain composition, using hmmtop (<http://www.sacs.ucsf.edu/cgi-bin/hmmtop.py>)  
604 [85,86]. Sequences containing  $\geq 4$  TMs were analysed as described below.

605

### 606 **Homology analyses**

607 All GPCRs were used as BLASTp [87] queries, to identify their closest (highest  
608 scoring) match in the ncbi non-redundant (nr) protein sequence dataset  
609 (<https://blast.ncbi.nlm.nih.gov/Blast.cgi>), with default settings and the “Organism” field  
610 set to exclude Platyhelminthes (taxid: 6157). All GPCRs were additionally searched  
611 against more phylogenetically limited datasets, by using the “Organism” field to limit  
612 the BLASTp searches to: (i) Basal phyla, Ctenophora (taxid:10197), Porifera  
613 (taxid:6040), Placozoa (taxid:10226), Cnidaria (taxid:6073); (ii) Superphylum  
614 Lophotrochozoa (taxid: 1206795), excluding phylum Platyhelminthes (taxid: 6157);  
615 (iii) Superphylum Ecdysozoa (taxid: 1206794); (iv) Superphylum Deuterostomia  
616 (taxid: 33511). For BLASTp searches against other flatworms, we performed local  
617 BLAST+ [88] on the WBPS9 release of WormBase Parasite, which included  
618 predicted protein datasets from 30 flatworm species. In all cases, we recorded the  
619 single highest scoring hit, or recorded “no significant similarity found” in cases where  
620 no hits were returned (Table S1); sequences generating both GPCR hits and “no  
621 hits” were retained. Where the top hit was not to a GPCR, that sequence was  
622 removed from the dataset.

623

### 624 **Domain composition**

625 GPCR identities were confirmed using InterProScan Sequence Search  
626 ([www.ebi.ac.uk/interpro/search/sequence-search](http://www.ebi.ac.uk/interpro/search/sequence-search)) [89] and/or HMMER HMMScan  
627 ([www.ebi.ac.uk/Tools/hmmer/search/hmmscan](http://www.ebi.ac.uk/Tools/hmmer/search/hmmscan)) [90]. Again, sequences returning  
628 non-GPCR domains were omitted from the dataset, with all others retained.

629

## 630 **Motif identification**

631 As an additional measure of confidence in our identifications, we analysed the  
632 presence/absence of key motifs diagnostic of receptor families and subfamilies.  
633 These analyses were performed for rhodopsins generally, the ligand binding domains  
634 (LBDs) of rhodopsin receptors for acetylcholine (ACh), neuropeptide F/Y (NPF/Y),  
635 octopamine and serotonin (5-hydroxytryptamine, 5HT), and for the LBDs of  
636 glutamate and frizzled/smoothed families. Motifs were identified via protein  
637 multiple sequence alignment (MSA) of GPCRs, performed in MAFFT  
638 ([www.mafft.cbrc.jp/alignment/server](http://www.mafft.cbrc.jp/alignment/server)) [91]. Only identical amino acids were accepted  
639 at each site, with conservation expressed as % identity across all sites. Motif  
640 illustrations (Figures 3 & 7) were generated using WebLogo 3  
641 (<http://weblogo.threeplusone.com>) [92].

642

## 643 **Phylogenetic reconstruction**

644 Maximum likelihood (ML) phylogenetic trees were constructed using PhyML  
645 (<http://www.phylogeny.fr>) [93], from protein MSA generated in MAFFT  
646 ([www.mafft.cbrc.jp/alignment/server/](http://www.mafft.cbrc.jp/alignment/server/)) [91]. Alignments were manually edited (in  
647 Mega v7) to include only TM domains, by removing extramembrane blocks aligned  
648 with human glutamate, rhodopsin, adhesion or frizzled proteins. Trees were  
649 constructed from these TM-focused alignments in PhyML using default parameters,  
650 with branch support assessment using the approximate likelihood ratio test (aLRT),  
651 under “SH-like” parameters. Trees, exported from PhyML in newick format were  
652 drawn and annotated in FigTree v1.4.2 (<http://tree.bio.ed.ac.uk/software/figtree/>).

653

## 654 **RNA-Seq analyses**

655 Expression of *F. hepatica* GPCRs was investigated in publically available and in-  
656 house generated RNA-Seq datasets. These included developmentally staged  
657 Illumina transcriptome reads associated with one of the *F. hepatica* genome projects

658 [18] (reads accessed from the European Nucleotide Archive at  
659 <http://www.ebi.ac.uk/ena/data/search?query=PRJEB6904>). These samples  
660 originated from distinct developmental stages of US Pacific Northwest Wild Strain *F.*  
661 *hepatica* (Baldwin Aquatics), including egg ( $n=2$ ), metacercariae (met;  $n=4$ ), *in vitro*  
662 NEJs 1h post-excystment (NEJ1h;  $n=1$ ), *in vitro* NEJs 3h post-excystment (NEJ3h;  
663  $n=2$ ), *in vitro* NEJs 24h post-excystment (NEJ24h;  $n=2$ ), *ex-vivo* liver-stage juveniles  
664 (juv1;  $n=1$ ) and *ex-vivo* adult parasites (Ad;  $n=3$ ). Our in-house datasets were  
665 generated from *ex vivo* liver stage *F. hepatica* juveniles (Italian strain, Ridgeway  
666 Research Ltd, UK), recovered from rat (Sprague Dawley) hosts at 21 days following  
667 oral administration of metacercariae (juv2;  $n=3$ ). Total RNA, extracted with Trizol  
668 (ThermoFisher Scientific) from each of the 3 independent biological replicates, was  
669 quantified and quality checked on an Agilent Bioanalyzer, converted into paired-end  
670 sequencing libraries and sequenced on an Illumina HiSeq2000 by the Centre for  
671 Genomic Research at the University of Liverpool, UK. RNA samples were spiked  
672 prior to library construction with the ERCC RNA Spike-In Mix (ThermoFisher  
673 Scientific) [94]. All read samples were analysed using the TopHat and Cufflinks  
674 pipeline [95-100], with mapping against PRJEB6687 genome sequence and  
675 annotation files (accessed from WormBase Parasite;  
676 <http://parasite.wormbase.org/ftp.html>). Data were expressed as number of fragments  
677 mapped per million mapped reads per kilobase of exon model (FPKM). In juv2  
678 datasets we discarded GPCRs represented by fewer than 0.5 FPKM (the minimum  
679 linear sensitivity that we detected with our ERCC spike in); for the staged datasets,  
680 we included only receptors represented by  $\geq 0.5$  FPKM in at least one life stage.  
681 Heatmaps were generated with heatmapper (<http://www.heatmapper.ca/>) [101] set  
682 for Average Linkage, and Pearson Distance Measurement.  
683

684 **References**

- 685 1. Abunna F, Asfaw L, Megersa B, Regassa A. Bovine fasciolosis: coprological,  
686 abattoir survey and its economic impact due to liver condemnation at Soddo  
687 municipal abattoir, Southern Ethiopia. Trop Anim Health Prod. 2010;42:289-92.  
688
- 689 2. Habarugira G, Mbasinga G, Mushonga B, Teedzai C, Kandiwa E, Ojok L.  
690 Pathological findings of condemned bovine liver specimens and associated  
691 economic loss at Nyabugogo abattoir, Kigali, Rwanda. Acta Tropica. 2016;164:27-  
692 32.  
693
- 694 3. Howell A, Baylis M, Smith R, Pinchbeck G, Williams D. Epidemiology and impact  
695 of *Fasciola hepatica* exposure in high-yielding dairy herds. Prev Vet Med.  
696 2015;121:41-48.  
697
- 698 4. Sariözkan S & YalÇin C. Estimating the total cost of bovine fasciolosis in Turkey.  
699 Ann Trop Med Parasitol. 2011;105:439-444.  
700
- 701 5. Hotez PJ, Brindley PJ, Bethony JM, King CH, Pearce EJ, Jacobson J. Helminth  
702 infections: the great neglected tropical diseases. J Clin Invest. 2008;118:1311-1321.  
703
- 704 6. Toet H, Piedrafita DM, Spithill TW. Liver fluke vaccines in ruminants: strategies,  
705 progress and future opportunities. Int J Parasitol. 2014; 44:915-927.  
706
- 707 7. Kelley JM, Elliott TP, Beddow T, Anderson G, Skuce P, Spithill TW. Current threat  
708 of triclabendazole resistance in *Fasciola hepatica*. Trends Parasitol. 2016;32:458-469.  
709
- 710 8. Cabada MM, Lopez M, Cruz M, Delgado JR, Hill V, White C Jr. Treatment failure  
711 after multiple courses of triclabendazole among patients with fasciolosis in Cusco,

712 Peru: A case series. PLoS Negl Trop Dis. 2016;10: e0004361.

713

714 9. Winkelhagen AJS, Mank T, de Vries PJ, Soetekouw R. Apparent triclabendazole-  
715 resistant human *Fasciola hepatica* infection, the Netherlands. Emerg Infect Dis.  
716 2012;18:1028-1029.

717

718 10. Martin RJ, Robertson AP. Control of nematode parasites with agents acting on  
719 neuro-musculature systems: lessons for neuropeptide ligand discovery. Adv Exp  
720 Med Biol. 2010;692:138-154.

721

722 11. McVeigh P, Atkinson L, Marks NJ, Mousley A, Dalzell JJ, Sluder A et al. Parasite  
723 neuropeptide biology: seeding rational drug target selection? Int J Parasitol: Drugs  
724 Drug Res. 2012;2:76-91.

725

726 12. Ribeiro P & Patocka N. Neurotransmitter transporters in schistosomes: structure,  
727 function and prospects for drug discovery. Parasitol Int. 2013;62:629-638.

728

729 13. Lowery DE, Geary TG, Kubiak TM, Larsen MJ. G protein-coupled receptor-like  
730 receptors and modulators thereof. Pharmacia and Upjohn Company, United States.  
731 2003. Patent US 6632621 B1.

732

733 14. Saeger B, Schmitt-Wrede HP, Dehnhardt M, Benten WPM, Krücken J, Harder A  
734 et al. Latrophilin-like receptor from the parasitic nematode *Haemonchus contortus* as  
735 a target for the anthelmintic depsipeptide PF1022A. FASEB J. 2001;15:1332-1334.

736

- 737 15. Harder A, Schmitt-Wrede HP, Krücken J, Marinovski P, Wunderlich F, Willson J  
738 et al. Cyclooctadepsipeptides – an anthelmintically active class of compounds  
739 exhibiting a novel mode of action. *Int J Antimicrob Agents*. 2003;22:318-331.  
740
- 741 16. Buxton SK, Neveu C, Robertson AP, Martin RJ. On the mode of action of  
742 emodepside: slow effects on membrane potential and voltage-activated currents in  
743 *Ascaris suum*. *Br J Pharmacol*. 2011;164:453-470.  
744
- 745 17. Santos R, Ursu O, Gaulton A, Bento AP, Donadi RS, Bologa CG et al. A  
746 comprehensive map of molecular drug targets. *Nat Rev Drug Disc*. 2017;16:19-34  
747
- 748 18. Cwiklinski K, Dalton JP, Dufresne PJ, La Course J, Williams DJL, Hodgkinson J  
749 et al. The *Fasciola hepatica* genome: gene duplication and polymorphism reveals  
750 adaptation to the host environment and the capacity for rapid evolution. *Genome*  
751 *Biol*. 2015;16:71. Doi:10.1186/s13059-015-0632-2.  
752
- 753 19. McNulty SN, Tort JF, Rinaldi G, Fischer K, Rosa BA, Smircich P, et al. Genomes  
754 of *Fasciola hepatica* from the Americas reveal colonization with *Neorickettsia*  
755 endobacteria related to the agents of Potomac horse and human sennetsu fevers.  
756 *PLoS Genetics*. 2017;13: e1006537.  
757
- 758 20. Campos TD, Young ND, Korhonen PK, Hall RS, Mangiola S, Lonie A et al.  
759 Identification of G protein-coupled receptors in *Schistosoma haematobium* and *S.*  
760 *mansoni* by comparative genomics. *Parasit Vectors*. 2014;7:242. Doi: 10.1186/1756-  
761 3305-7-242.  
762
- 763 21. Zamanian M, Kimber MJ, McVeigh P, Carlson SA, Maule AG, Day TA. The  
764 repertoire of G protein-coupled receptors in the human parasite *Schistosoma*

- 765 *mansoni* and the model organism *Schmidtea mediterranea*. BMC Genomics.  
766 2011;12: 596  
767
- 768 22. Tsai IJ, Zarowiecki M, Holroyd N, Garcarrubio A, Sanchez-Flores A, Brooks KL,  
769 et al. The genomes of four tapeworm species reveal adaptations to parasitism.  
770 Nature. 2013;496:57-63.  
771
- 772 23. Omar HH, Humphries JE, Larsen MJ, Kubiak TM, Geary TG, Maule AG et al.  
773 Identification of a platyhelminth neuropeptide receptor. Int J Parasitol. 2007;37:725-  
774 733.  
775
- 776 24. Saberi A, Jamal A, Beets I, Schoofs L, Newmark PA. GPCRs direct germline  
777 development and somatic gonad function in planarians. PLoS Biol.  
778 2016;14(5):e1002457. Doi: 10/1371/journal.pbio.1002457.  
779
- 780 25. Fredriksson R, Lagerström MC, Lundin LG, Schiöth HB. The G-protein-coupled  
781 receptors in the human genome form five main families. Phylogenetic analysis,  
782 paralogon groups, and fingerprints. Mol Pharmacol. 2003;63:1256-1272.  
783
- 784 26. Lagerström MC, Schiöth HB. Structural diversity of G protein-coupled receptors  
785 and significance for drug discovery. Nat Rev Drug Discov. 2008;7:339-357.  
786
- 787 27. Martin-Duran JM, Ryan JF, Vellutini BC, Pang K, Hejnal A. Increased taxon  
788 sampling reveals thousands of hidden orthologs in flatworms. Genome Res.  
789 2017;27:1263-1272.  
790

- 791 28. Khalturin K, Hemmrich G, Fraune S, Augustin R, Bosch TCG. More than just  
792 orphans: are taxonomically-restricted genes important in evolution? Trends Genet.  
793 2009;25:404-413.  
794
- 795 29. Pearson WR. UNIT 3.1 An introduction to sequence similarity (“homology”)  
796 searching. Curr Protoc Bioinformatics DOI: 10.1002/0471250953.bi0301s42.  
797
- 798 30. Dell’Oca N, Basika T, Corvo I, Castillo E, Brindley PJ, Rinaldi G et al. RNA  
799 interference in *Fasciola hepatica* newly excysted juveniles: Long dsRNA induces  
800 more persistent silencing than siRNA. Mol Biochem Parasitol. 2014;197:28-35.  
801
- 802 31. McGonigle L, Mousley A, Marks NJ, Brennan GP, Dalton JP, Spithill TW et al.  
803 The silencing of cysteine proteases in *Fasciola hepatica* newly excysted juveniles  
804 using RNA interference reduced gut penetration. Int J Parasitol. 2008;38:149-155.  
805
- 806 32. McVeigh P, McCammick EM, McCusker P, Mophew RM, Mousley A, Abidi A et  
807 al. RNAi dynamics in juvenile *Fasciola* spp. liver flukes reveals the persistence of  
808 gene silencing *in vitro*. PLoS Negl Trop Dis. 2014;8(9): e3185.  
809
- 810 33. Rinaldi G, Morales ME, Cancela M, Castillo E, Brindley PJ et al. Development of  
811 functional genomic tools in trematodes: RNA interference and luciferase reporter  
812 gene activity in *Fasciola hepatica*. PLoS Negl Trop Dis 2008;2(7):e260.  
813
- 814 34. McCammick E, McVeigh P, McCusker P, Timson DJ, Mophew RM, Brophy PM  
815 et al. Calmodulin disruption impacts growth and motility in juvenile liver fluke. Parasit  
816 Vectors. 2016;9:46.  
817



- 818 35. McCusker P, McVeigh P, Rathinasamy V, Toet H, McCammick E, O'Connor A et  
819 al. Stimulating neoblast-like cell proliferation in juvenile *Fasciola hepatica* supports  
820 growth and progression towards the adult phenotype *in vitro*. PLoS Negl Trop Dis.  
821 2016;10(9):e0004994.
- 822
- 823 36. McVeigh P, Mair GR, Atkinson L, Ladurner P, Zamanian M, Novozhilova E et al.  
824 Discovery of multiple neuropeptide families in the phylum Platyhelminthes. Int J  
825 Parasitol. 2009;39:1243-1252.
- 826
- 827 37. Collins JJ 3<sup>rd</sup>, Hou X, Romanova EV, Lambrus BG, Miller CM, Saberi A et al.  
828 Genome-wide analyses reveal a role for peptide hormones in planarian germline  
829 development. PLoS Biol. 2010;8(10):e1000509.
- 830
- 831 38. Koziol U, Koziol M, Preza M, Costábile A, Brehm K, Castillo E. De novo  
832 discovery of neuropeptides in the genomes of parasitic flatworms using a novel  
833 comparative approach. Int J Parasitol. 2016;46:709-721.
- 834
- 835 39. Åkerberg, H, Fällmar H, Sjödin P, Boukharta L, Gutiérrez-de-Terán H, Lundell I,  
836 et al. Mutagenesis of human neuropeptide Y/peptide YY receptor Y2 reveals  
837 additional differences to Y1 in interactions with highly conserved ligand positions.  
838 Regul Pept. 2010;163:120–910.
- 839
- 840 40. Berglund MM, Fredriksson R, Salaneck E, Larhammar D. Reciprocal mutations of  
841 neuropeptide Y receptor Y2 in human and chicken identify amino acids important for  
842 antagonist binding. FEBS Lett. 2002;518:5–910
- 843
- 844 41. Fällmar H, Åkerberg H, Gutiérrez-de-Terán H, Lundell I, Mohell N, Larhammar D.  
845 Identification of positions in the human neuropeptide Y/peptide YY receptor Y2 that

846 contribute to pharmacological differences between receptor subtypes.  
847 Neuropeptides. 2011;45:293–300.  
848  
849 42. Sautel M, Martinez R, Munoz M, Peitsch MC, Beck-Sickinger AG, Walker P. Role  
850 of a hydrophobic pocket of the human Y1 neuropeptide Y receptor in ligand binding.  
851 Mol Cell Endocrinol. 1995;112:215–221.  
852  
853 43. Sautel M, Rudolf K, Wittneben H, Herzog H, Martinez R, Munoz M, et al.  
854 Neuropeptide Y and the non-peptide antagonist BIBP 3226 share an overlapping  
855 binding site at the human Y1 receptor. Mol Pharmacol. 1996;50:285–292.  
856  
857 44. Vogel KJ, Brown MR, Strand MR. Phylogenetic investigation of peptide hormone  
858 and growth factor receptors in five dipteran genomes. Front Endocrinol (Lausanne).  
859 2013;4:193. Doi: 10/3389/fendo.2013.00193.  
860  
861 45. Mousley A, Moffett CL, Duve H, Thorpe A, Halton DW, Geary TG et al.  
862 Expression and bioactivity of allatostatin-like neuropeptides in helminths. Int J  
863 Parasitol. 2005;35:1557-1567.  
864  
865 46. Yoshida M, Miyazato M, Kangawa K. Orphan GPCRs and methods for identifying  
866 their ligands. Methods Enzymol. 2012;514:33-44.  
867  
868 47. Stockert JA, Devi LA. Advancements in therapeutically targeting orphan GPCRs.  
869 Front. Pharmacol. 2015;6:100. Doi:10.3389/fphar.2015.00100.  
870  
871 48. Ribeiro P, El-Shehabi F, Patocka N. Classical transmitters and their receptors in  
872 flatworms. Parasitology. 2005;131:S19-S40.  
873

- 874 49. Nishimura K, Unemura K, Tsushima J, Yamauchi Y, Taniguchi T, Kaneko S et al.  
875 Identification of a novel planarian G-protein-coupled receptor that responds to  
876 serotonin in *Xenopus laevis* oocytes. Biol Pharm Bull. 2009;32:1672-1677.  
877
- 878 50. Zamanian M, Agbedanu PN, Wheeler NJ, McVeigh P, Kimber MJ, Day TA. Novel  
879 RNAi-mediated approach to G protein-coupled receptor deorphanization: proof of  
880 principle and characterization of a planarian 5-HT receptor. PLoS One.  
881 2012;7(7):e40787.  
882
- 883 51. Patocka N, Sharma N, Rashid M, Ribeiro P. Serotonin signaling in *Schistosoma*  
884 *mansoni*: A serotonin-activated G protein-coupled receptor controls parasite  
885 movement. PLoS Pathog. 2014;10(1):e1003878.  
886
- 887 52. Wacker D, Wang C, Katritch V, Han GW, Huang XP, Vardy E et al. Structural  
888 features for functional selectivity at serotonin receptors. Science. 2013;340:615-619.  
889
- 890 53. Wang C, Jiang Y, Ma J, Wu H, Wacker D, Katritch V et al. Structural basis for  
891 molecular recognition at serotonin receptors. Science. 2013;340:610-614.  
892
- 893 54. Taman A, Ribeiro P. Investigation of a dopamine receptor in *Schistosoma*  
894 *mansoni*: functional studies and immunolocalization. Mol Biochem Parasitol.  
895 2009;168:24-33.  
896
- 897 55. Kalani MY, Vaidehi N, Hall SE, Trabanino RJ, Freddolino PL, Kalani MA et al.  
898 The predicted 3D structure of the human D2 dopamine receptor and the binding site  
899 and binding affinities for agonists and antagonists. Proc Natl Acad Sci USA.  
900 2004;101:3815-3820.  
901

- 902 56. Ribeiro P, Webb RA. The occurrence and synthesis of octopamine and  
903 catecholamines in the cestode *Hymenolepis diminuta*. Mol Biochem Parasitol.  
904 1983;7:53-62.  
905
- 906 57. Nishimura K, Kitamura Y, Inoue T, Umesono Y, Yoshimoto K, Taniguchi T et al.  
907 Characterization of tyramine beta-hydroxylase in planarian *Dugesia japonica*: cloning  
908 and expression. Neurochem Int. 2008;53:184-192.  
909
- 910 58. Hirashima A, Huang H. Homology modeling, agonist binding site identification,  
911 and docking in octopamine receptor of *Periplaneta americana*. Comput Biol Chem  
912 2008;32:185-90.  
913
- 914 59. Huang J, Hamasaki T, Ozoe F, Ohta H, Enomoto K, Kataoka H, et al.  
915 Identification of critical structural determinants responsible for octopamine binding to  
916 the alpha-adrenergic-like *Bombyx mori* octopamine receptor. Biochemistry.  
917 2007;46:5896-903.  
918
- 919 60. McVeigh P, Maule AG. Flatworm neurobiology in the postgenomic era. In: Byrne  
920 JH, Editor. Oxford Handbook of Invertebrate Neurobiology. Oxford University Press,  
921 2015.  
922
- 923 61. Kruse AC, Hu J, Pan AC, Arlow DH, Rosenbaum DM, Rosemond E et al.  
924 Structure and dynamics of the M3 muscarinic acetylcholine receptor. Nature.  
925 2012;482:552-556.  
926
- 927 62. MacDonald K, Kimber MJ, Day TA, Ribeiro P. A constitutively active G protein-  
928 coupled acetylcholine receptor regulates motility of larval *Schistosoma mansoni*. Mol  
929 Biochem Parasitol. 2016;202:29-37.

930

931 63. Wellendorph P, Brauner-Osborne H. Molecular basis for amino acid sensing by  
932 family C G-protein-coupled receptors. *Br J Pharmacol.* 2009;156:869-84.

933

934 64. Orlandi C, Masuho I, Posokhova E, Cao Y, Ray T, Hasan N. GPR158 and  
935 GPR179: a subfamily of orphan GPCRs as a new class of signaling modulators.  
936 *FASEB J.* 2013; 27(1). Supplement 1095.2.

937

938 65. Orhan E, Prezeau L, El Shamieh S, Bujakowska KM, Michiels C, Zagar Y et al.  
939 Further insights into GPR179: expression, localization and associated pathogenic  
940 mechanisms leading to complete congenital stationary night blindness. *Invest*  
941 *Ophthalmol Vis Sci.* 2013;54: 8041-8050.

942

943 66. Patel N, Itakura T, Jeong S, Liao CP, Roy-Burman P, Zandi E. Expression and  
944 functional role of orphan receptor GPR158 in prostate cancer growth and  
945 progression. *PLoS One.* 2015;10(2): e0117758.

946

947 67. Mitri C, Parmentier ML, Pin JP, Bockaert J, Grau Y. Divergent evolution in  
948 metabotropic glutamate receptors. A new receptor activated by an endogenous  
949 ligand different from glutamate in insects. *J Biol Chem.* 2004;279:9313-9320.

950

951 68. Mendonça-Silva DL, Gardino PF, Kubrusly RC, De Mello FG, Noël F.  
952 Characterization of a GABAergic neurotransmission in adult *Schistosoma mansoni*.  
953 *Parasitology.* 2004;129:137-146.

954

955 69. Janda CY, Waghray D, Levin AM, Thomas C, Garcia KC. Structural basis of Wnt  
956 recognition by Frizzled. *Science.* 2012;337:59-64.

957

- 958 70. Li HF, Wang XB, Jin YP, Xia YX, Feng XG, Yang JM et al. Wnt4, the first  
959 member of the Wnt family identified in *Schistosoma japonicum*, regulates worm  
960 development by the canonical pathway. Parasitol Res. 2010;107:795-805.  
961
- 962 71. Ta N, Feng X, Deng L, Fu Z, Hong Y, Liu J et al. Characterization and expression  
963 analysis of Wnt5 in *Schistosoma japonicum* at different developmental stages.  
964 Parasitol Res. 2015;114:3261-3269.  
965
- 966 72. Willert K, Nusse R. Wnt proteins. Cold Spring Harb Perspect Biol.  
967 2012;4(9):a007864.  
968
- 969 73. Smallwood PM, Williams J, Xu Q, Leahy DJ, Nathans J. Mutational analysis of  
970 Norrin-Frizzled4 recognition. J Biol Chem. 2007;282:4057-4068.  
971
- 972 74. Ayers KL, Théron PP. Evaluating Smoothed as a G-protein-coupled receptor  
973 for Hedgehog signalling. Trends Cell Biol. 2010;20:287-298.  
974
- 975 75. Gehrke AR, Srivastava M. Neoblasts and the evolution of whole-body  
976 regeneration. Curr Opin Genet Dev. 2016;40:131-137.  
977
- 978 76. Collins JJ 3<sup>rd</sup>, Wang B, Lambrus BG, Tharp ME, Iyer H, Newmark PA. Adult  
979 somatic stem cells in the human parasite *Schistosoma mansoni*. Nature.  
980 2013;494:476-479.  
981
- 982 77. Koziol U, Rauschendorfer T, Zanon Rodriguez L, Krohne G, Brehm K. The  
983 unique stem cell system of the immortal larvae of the human parasite *Echinococcus*  
984 *multilocularis*. Evodevo. 2014;5(1):10. Doi: 10.1186/2041-9139-5-10.  
985

- 986 78. Wang B, Collins JJ 3<sup>rd</sup>, Newmark PA. Functional genomic characterization of  
987 neoblast-like stem cells in larval *Schistosoma mansoni*. *Elife*. 2013;2:e00768.  
988
- 989 79. Gurley KA, Rink JC, Sanchez-Alvarado A. beta-catenin defines head versus tail  
990 identity during planarian regeneration and homeostasis. *Science*. 2008;319:323-327.  
991
- 992 80. Petersen CP, Reddien PW. Smed-betacatenin-1 is required for anterioposterior  
993 blastema polarity in planarian regeneration. *Science*. 2008;319:327-330.  
994
- 995 81. Langenhan T, Aust G, Hamann J. Sticky signaling – adhesion class G protein-  
996 coupled receptors take the stage. *Sci Signal*. 2013;6:re3. Doi:  
997 10.1126/scisignal.2003825.  
998
- 999 82. Mousley A, Marks NJ, Halton DW, Geary TG, Thompson DP, Maule AG.  
1000 Arthropod FMRFamide-related peptides modulate muscle activity in helminths. *Int J*  
1001 *Parasitol*. 2004;34:755-768.  
1002
- 1003 83. Howe KL, Bolt BJ, Shafie M, Kersey P, Berriman M. WormBase ParaSite – a  
1004 comprehensive resource for helminth genomics. *Mol Biochem Parasitol*. 2017;215:2-  
1005 10.  
1006
- 1007 84. Kumar S, Stecher G, Tamura K. MEGA7: Molecular Evolutionary Genetics  
1008 Analysis version 7.0 for bigger datasets. *Mol Biol Evol*. 2016;33:1870-1874.  
1009
- 1010 85. Tusnday GE, Simon I. Principals governing amino acid composition of integral  
1011 membrane proteins: application to topology prediction. *J Mol Biol*. 1998;283:489-506.  
1012

- 1013 86. Tusnday GE, Simon I. The HMMTOP transmembrane topology prediction server.  
1014 Bioinformatics. 2001;17:849-850.  
1015
- 1016 87. Altschul SF, Gish W, Miller W, Myers EW, Lipman DJ. Basic local alignment  
1017 search tool. J Mol Biol. 1990;215:403-410.  
1018
- 1019 88. Camacho C, Coulouris G, Avagyan V, Ma N, Papadopoulos J, Bealer K et al.  
1020 BLAST+: architecture and applications. BMC Bioinformatics. 2008;10:421.  
1021
- 1022 89. Jones P, Binns D, Chang HY, Fraser M, Li W, McAnulla C et al. InterProScan 5:  
1023 genome-scale protein function classification. Bioinformatics. 2014;  
1024 doi:10.1093/bioinformatics/btu031  
1025
- 1026 90. Finn RD, Clements J, Arndt W, Miller BL, Wheeler TJ, Schreiber F et al. HMMER  
1027 web server: 2015 update. Nucleic Acids Res. 2015;43:W30-W38.  
1028
- 1029 91. Kato H, Rozewicki J, Yamada KD. MAFFT online service: multiple sequence  
1030 alignment, interactive sequence choice and visualization. Brief Bioinform. 2017; doi:  
1031 10.1093/bib/bbx108.  
1032
- 1033 92. Crooks GE, Hon G, Chandonia JM, Brenner SE. WebLogo: A sequence logo  
1034 generator. Genome Res. 2004;14:1188-1190.  
1035
- 1036 93. Dereeper A, Guignon V, Blanc G, Audic S, Buffet S, Chevenet F et al.  
1037 Phylogeny.fr: robust phylogenetic analysis for the non-specialist. Nucleic Acids Res.  
1038 2008;36:W465-469.  
1039



- 1040 94. Jiang L, Schlesinger F, Davis CA, Zhang Y, Li R, Salit M et al. Synthetic spike-in  
1041 standards for RNA-Seq experiments. *Genome Res.* 2011;21:1543-1551.  
1042
- 1043 95. Langmead B, Trapnell C, Pop M, Salzberg SL. Ultrafast and memory-efficient  
1044 alignment of short DNA sequences to the human genome. *Genome Biol.*  
1045 2009;10:R25. Doi: 10/1186/gb-2009-10-3-r25.  
1046
- 1047 96. Trapnell C, Pachter L, Salzberg SL. TopHat: discovering splice junctions with  
1048 RNA-seq. *Bioinformatics.* 2009;25:1105–1111.  
1049
- 1050 97. Trapnell C, Williams B, Pertea G, Mortazavi A, Kwan G, van Baren J et al.  
1051 Transcript assembly and quantification by RNA-Seq reveals unannotated transcripts  
1052 and isoform switching during cell differentiation. *Nat Biotechnol.* 2010;  
1053 doi:10.1038/nbt.1621.  
1054
- 1055 98. Trapnell C, Hendrickson D, Sauvageau M, Goff L, Rinn JL, Pachter L. Differential  
1056 analysis of gene regulation at transcript resolution with RNA-Seq. *Nat Biotechnol.*  
1057 2012; doi:10.1038/nbt.2450.  
1058
- 1059 99. Trapnell C, Roberts A, Goff L, Pertea G, Kim D, Kelley DR et al. Differential gene  
1060 and transcript expression analysis of RNA-seq experiments with TopHat and  
1061 Cufflinks. *Nat Protoc.* 2012;7:562-578.  
1062
- 1063 100. Roberts A, Trapnell C, Donaghey J, Rinn JL, Pachter L. Improving RNA-Seq  
1064 expression estimates by correcting for fragment bias. *Genome Biol.* 2011;  
1065 doi:10.1186/gb-2011-12-3-r22.  
1066

1067

1068 101. Babicki S, Arndt D, Marcu A, Liang Y, Grant JR, Maciejewski A et al.

1069 Heatmapper: web-enabled heat mapping for all. *Nucleic Acids Res.* 2016;44:W147-

1070 W153.

1071

1072 102. Nakamura Y, Ishii J, Kondo A. Applications of yeast-based signaling sensor for

1073 characterization of antagonist and analysis of site-directed mutants of the human

1074 serotonin 1A receptor. *Biotechnol Bioeng* (2015) 112(9):1906-15.

1075

1076 103. Galvez T, Prezeau L, Milioti G, Franek M, Joly C, Froestl W, Bettler B, Bertrand

1077 HG, Blahos J, Pin JP. Mapping the agonist binding site of GABA<sub>B</sub> type 1 subunit

1078 sheds light on the activation process of GABA<sub>B</sub> receptors. *J Biol Chem* (2000) 275,

1079 41166-41174.

1080

1081 104. Geng Y, Bush M, Mosyak L, Wang F, Fan QR. Structural mechanism of ligand

1082 activation in human GABA(B) receptor. *Nature* (2013) 504(7479):254-9.

1083

1084 **Figure Captions**

1085 **Fig 1: Methods for discovery and annotation of *Fasciola hepatica* G protein**

1086 **coupled receptors (FhGPCRs).** (A) Hidden Markov Models (HMMs) representing  
1087 glutamate, rhodopsin, adhesion, frizzled/smoothed and secretin families, and two  
1088 rhodopsin subfamilies, were built from protein multiple sequence alignments of  
1089 *Schistosoma mansoni* and *Schmidtea mediterranea* GPCRs [21]. HMMs were built  
1090 and searched respectively using the *hmmbuild* and *hmmsearch* modules of HMMER  
1091 v3.0. Searches were performed against two publically available *F. hepatica*  
1092 genomes using *hmmsearch* and basic local alignment search tool (BLAST) tools.  
1093 Each putative FhGPCR sequence was assessed for transmembrane (TM) domain  
1094 composition with *hmmtop* before classification using tools including BLASTp,  
1095 Interproscan and CLANS. (B) The largest proportion (49%) of FhGPCRs carried the  
1096 full complement of 7 TMs, with 88% of sequences bearing at least 4 TMs. (C)  
1097 GRAFS composition of 146 FhGPCRs carrying  $\geq 4$  TMs. (D) Rhodopsins were  
1098 subject to further classification, including BLASTp vs datasets representing major  
1099 non-flatworm animal phyla and superphyla. These rhodopsin homology  
1100 classifications fed back into phylogenetic analyses versus deorphanised bilaterian  
1101 GPCRs to confirm their putative ligand selectivity, with a final analysis of ligand  
1102 binding domain composition comparing conservation of ligand interacting residues  
1103 for characterised GPCRs reported in the literature with our *F. hepatica* assignments.

1104

1105 **Fig 2: Phylogenetic classification of *Fasciola hepatica* rhodopsin G protein-**

1106 **coupled receptors.** (A) Maximum-likelihood cladogram of *F. hepatica* rhodopsins.  
1107 Phylogeny delineated clades containing rhodopsins with distinct homologies (RA,  
1108 amine; RP, peptide; RO, opsin: R, orphan rhodopsin). The orphan clades contained  
1109 sequences with generally low BLASTp similarity to their closest non-flatworm  
1110 BLASTp hit, but concentrated within them were 18 sequences with exceptionally low  
1111 ( $E > 0.01$ ) BLASTp similarity to non-flatworm sequences (fwRhods). The tree was

1112 midpoint rooted and was generated from a multiple protein sequence alignment  
1113 trimmed to TM domains I-VII. Numbers at nodes indicate statistical support from  
1114 approximate likelihood ratio test (aLRT). Tip colours are coded according to the E-  
1115 value scale (as indicated) of that GPCR's closest BLASTp match in the ncbi nr  
1116 database, excluding phylum Platyhelminthes. (B) Summary of sequence similarity  
1117 comparisons between GPCRs within each rhodopsin clade, and their closest  
1118 BLASTp hits in major phylogenetic groups (Basal: Cnidaria, Ctenophora, Porifera,  
1119 Placozoa; superphylum Lophotrochozoa, omitting Platyhelminthes; Superphylum  
1120 Ecdysozoa; superphylum Deuterostomia; phylum Platyhelminthes). BLASTp E-value  
1121 (median) is summarised in each case, colour coded as a heat map on the same  
1122 colour scale as (A). The number of GPCRs comprising each *F. hepatica* clade (*n*) is  
1123 also indicated. (C) Sequence diversity within ubiquitous rhodopsin motifs of the  
1124 majority (117) of the *F. hepatica* rhodopsins (upper panel), compared to those motifs  
1125 in 18 *F. hepatica* fwRhods (lower panel). The mammalian consensus motifs are  
1126 illustrated above the top panel, along with an illustration of the location of each motif  
1127 within the rhodopsin 7TM domain structure. Some variability is visible within the TM2  
1128 and TM6 motifs, but TM3 and TM7 motifs are well conserved.

1129

1130 **Fig 3: Identification of flatworm-specific rhodopsins (fwRhods) in genomes**

1131 **from phylum Platyhelminthes.** (A) The 18 *Fasciola hepatica* GPCRs in our dataset  
1132 that had poor BLASTp similarity ( $E > 0.01$ ) to non-flatworm sequences in the ncbi nr  
1133 dataset (lsGPCRs), were used as queries in BLASTp searches of flatworm genomes  
1134 in WormBase Parasite (release WBPS9). All hits scoring  $E < 0.01$  were back-  
1135 searched by BLASTp against our *F. hepatica* GPCR dataset. Sequences scoring  
1136  $E < 0.01$  against one of the original *F. hepatica* GPCRs were retained as matches.  
1137 These sequences were then filtered to identify those lacking matches in ncbi nr,  
1138 lacking non-GPCR protein domains, possessing at least 4 transmembrane (TM)  
1139 domains, and containing rhodopsin motifs consistent with those seen in the majority

1140 of *F. hepatica* rhodopsins (see C). (B) This process identified 76 fwRhods in phylum  
1141 Platyhelminthes, the majority (70) of which were from class Trematoda. Small  
1142 numbers were returned from classes Cestoda and Monogenea. Note that no  
1143 fwRhods fitting these criteria were identified in class Turbellaria. (C) Sequence  
1144 diversity within ubiquitous rhodopsin motifs of 18 *F. hepatica* fwRhods (upper panel),  
1145 compared to those motifs in the 58 fwRhods identified in the wider phylum (lower  
1146 panel); motifs are broadly similar between *F. hepatica* and the rest of the phylum.  
1147 (D) Maximum likelihood phylogeny of 76 fwRhods, alongside flatworm-specific  
1148 rhodopsins described previously (70 platyhelminth rhodopsin orphan family 1  
1149 (PROF1) [21,22], and 245 *S. mediterranea* G protein coupled receptor [GCRs,  
1150 comprising RhoL, RhoR, SrfA, SrfB and SrfC families, reported as lacking non-  
1151 flatworm homologues [24]) with branches coloured to indicate Family (dark blue,  
1152 PROF1; mid blue, SrfA; cyan, Rho-L; green, Rho-R; orange, SrfB; purple, SrfC; red,  
1153 fwRhod). Tree was rooted to a human rhodopsin (P08100) and was generated from  
1154 an alignment trimmed to transmembrane domains I-VII. Numbers at nodes indicate  
1155 statistical support from approximate likelihood ratio test (aLRT).

1156

1157 **Fig 4: Conservation of ligand-interacting residues between 17 *Fasciola***  
1158 ***hepatica* G protein-coupled receptors (GPCRs) and structurally characterized**  
1159 **homologues from other species. (A) Neuropeptide F/Y receptor ligand binding**  
1160 **residues as characterised by mutagenesis in human neuropeptide Y receptor NPY1R**  
1161 **[39-43], and conserved in *Anopheles gambiae* (Ag) and *Drosophila melanogaster***  
1162 **(Dm) neuropeptide F receptors (NPFR) [44]. Numbering relative to HsNPY1R. (B)**  
1163 **Serotonin (5-hydroxytryptamine; 5HT) receptor ligand binding residues as**  
1164 **characterised by mutagenesis in human 5HT receptor (Hs5HT1A) [102], and**  
1165 **conserved in *Schistosoma mansoni* 5HTR [51]. Numbering relative to Hs5HT1A.**  
1166 **(C) Octopamine receptor (OaR) ligand binding residues as characterised by**  
1167 **homology modelling of the *Periplaneta americana* (Pa) [58], and mutational analysis**

1168 of the *Bombyx mori* (Bm) [59] octopamine receptor ligand binding domain.  
1169 Numbering relative to PaOAR, except for Y412 which is shown relative to BmOAR.  
1170 (D) Acetylcholine receptor ligand binding residues as characterised by homology  
1171 modelling of the *S. mansoni* G protein-coupled acetylcholine receptor (SmGAR) [62];  
1172 numbering relative to SmGAR. In each case, only *F. hepatica* sequences displaying  
1173 at least 75% identity across the stated ligand binding residues are shown. Relative  
1174 positions of residues across seven transmembrane domains (TM1-7) are shown. TM  
1175 diagrams are not to scale.

1176

1177 **Fig 5: *Fasciola hepatica* glutamate G-protein coupled receptors (GPCRs)**  
1178 **display divergent phylogeny and ligand binding domain (LBD) composition.**

1179 (A) Maximum likelihood phylogeny containing three *F. hepatica* glutamate receptors,  
1180 alongside representative receptors from the various recognised GPCR Class C  
1181 subgroups (subclasses indicated by blue boxes: Ca<sup>2+</sup>, Ca<sup>2+</sup>-sensing receptor;  
1182 GABA<sub>B</sub>, γ-aminobutyric acid type B receptors; mGluR, metabotropic glutamate  
1183 receptors; Orphan, receptors with no known ligand; Taste, vertebrate taste  
1184 receptors). Two previously reported *Schistosoma mansoni* glutamate receptors are  
1185 also included; *F. hepatica* sequences are coloured red, *S. mansoni* are coloured  
1186 blue, all others are black. Node numbers indicate statistical support as determined  
1187 by approximate likelihood ratio test (aLRT). Tree was midpoint rooted. (B)  
1188 Conservation of ligand-interacting residues between vertebrate GABA<sub>B</sub> and  
1189 metabotropic glutamate receptors (mGluR), and *F. hepatica* class C GPCRs.  
1190 Agonist-interacting residues were identified by multiple protein sequence alignment  
1191 of *F. hepatica* glutamate receptors against mutationally-identified ligand interacting  
1192 residues (those causing a significant reduction in receptor signalling activity), from  
1193 mouse GABA<sub>B</sub> receptor (top panel), or selected human mGluR subtypes (lower  
1194 panel). Identical amino acids in *F. hepatica*/*S. mansoni* GPCRs are represented by  
1195 white text on black background, functionally conserved amino acids by black text on

1196 grey background. In lower panel, mutations causing a significant reduction in mGluR  
1197 receptor activity are bold and numbered, with the region of the glutamate molecule  
1198 bound by each residue indicated (COOH, C-terminus; NH<sub>2</sub>, N-terminus). For  
1199 references see [63,103,104].

1200

1201 **Fig 6: Frizzled/smoothened seven transmembrane receptors and wnt ligands in**

1202 ***Fasciola hepatica***. (A) Maximum likelihood phylogeny containing six *F. hepatica*  
1203 frizzled/smoothened receptors, alongside those from *Schistosoma mansoni*,  
1204 *Drosophila melanogaster*, *Caenorhabditis elegans* and *Homo sapiens* (identified by  
1205 FSMP, d, c and h, respectively). *F. hepatica* sequences are coloured red, *S.*  
1206 *mansoni* are coloured blue, all other species are coloured black. Radial labels  
1207 indicate human frizzled clusters (hClust) I-IV, and the smoothened clade. Node  
1208 numbers indicate statistical support as determined by approximate likelihood ratio  
1209 test (aLRT). Tree was rooted against a *Dictyostelium* frizzled sequence (dicty-fslJ-1).  
1210 Tree composition adapted from [21]. (B) WebLogo comparison of ligand interacting  
1211 residues between mouse fz1-10 (top panel) and *F. hepatica* frizzled receptors.  
1212 Numbering in top panel x-axis is relative to mouse fz8 [69]. (C) Three wnt-like  
1213 sequences exist in *F. hepatica*. Shading indicates positions of 22 characteristic Cys  
1214 residues, positions numbered relative to *D. melanogaster* wnt-1 (Dro-wnt-1).

1215

1216 **Fig 7: Expression profiling of 101 G protein-coupled receptors (GPCRs) in**

1217 ***Fasciola hepatica* life stages**. (A) Expression heatmap generated from log<sub>2</sub> FPKM  
1218 values of 83 GPCRs identified from developmentally staged RNA-seq libraries. Life  
1219 stages are represented in columns (Egg; Met, metacercariae; NEJ\_1h, newly-  
1220 excysted juvenile collected 1h post excystment; NEJ\_3h, NEJ collected 3h post-  
1221 excystment; NEJ\_24h, NEJ collected 24h post-excystment; Juv\_21d, liver stage  
1222 juvenile parasites collected from murine livers 21 days following oral administration of  
1223 metacercariae; Adult, adult parasites collected from the bile ducts of bovine livers).

1224 Rows indicate individual GPCRs, as denoted by the ID and phylogeny columns. The  
1225 latter indicates receptor classification and predicted ligand where available (see S1  
1226 Table). Expression cluster column indicates clusters of GPCRs with highest  
1227 expression focused in particular life stages. (B) Detection of 76 GPCRs in Illumina  
1228 RNA-Seq libraries generated from *F. hepatica* 21 day liver-stage juveniles, recovered  
1229 *ex vivo* from rat infections. Data show expression of three glutamate (G), one  
1230 adhesion (A), four frizzled (F), one smoothed (S) and 67 rhodopsin (R) GPCRs.  
1231 The rhodopsins include representatives of amine (RA1, RA3), opsin (RO), peptide  
1232 (RP1-7), and orphan (R2,3,4,6). Data points (each at  $n=3$ ) represent mean  $\log_2$   
1233 FPKM  $\pm$  95% confidence intervals, as calculated by cuffdiff. In both panels, flatworm  
1234 rhodopsins (fwRhods) are marked in red text. ACh, acetylcholine; AstA, Allatostatin  
1235 A; Dop, dopamine; FMRFa, FMRFamide; GHS, growth hormone secretagogue;  
1236 GYIRFa, GYIRFamide; Myom, myomodulin; Myos, myosuppressin; NPF/Y,  
1237 neuropeptide F/Y; Oct, octopamine; Pkt, prokineticin; Tyr, tyramine; 5HT, 5-  
1238 hydroxytryptamine.  
1239



1240 **Supporting Information Captions**

1241 **S1 Table. *Fasciola hepatica* G protein coupled receptor (GPCR) dataset**

1242 **summary.** Table describes sequences containing 4-9 transmembrane (TM)  
1243 domains. Each sequence is defined in terms of GRAFS family, and annotated for  
1244 TM composition, sequence length, phylogeny, domain composition and homology  
1245 relative to various datasets.

1246

1247 **S2 Text. *Fasciola hepatica* G protein-coupled receptor (GPCR) protein**  
1248 **sequence dataset.**

1249

1250 **S3 Table. Flatworm-specific rhodopsins (fwRhods) in *Fasciola hepatica* and**

1251 **other flatworms.** Species and genome IDs of sequences that have  $\geq 4$   
1252 transmembrane (TM) domains, and lack high-scoring orthologues in non-flatworms  
1253 (BLASTp score  $E \geq 0.01$  vs ncbi nr excluding Platyhelminthes), and show  
1254 conservation of at least two of the four ubiquitous rhodopsin motifs. Each sequence  
1255 is annotated for protein domains where present (Pfam HMMScan). Accessions refer  
1256 to WormBase ParaSite.

1257

1258 **S4 Table. Rhodopsin ubiquitous motifs and ligand binding domains for ACh,**

1259 **NPF/Y 5-HT, octopamine.** Note data are in individual tabs. Rhodopsin: Sequence  
1260 motifs extracted from alignment of *F. hepatica* rhodopsins, corresponding to  
1261 ubiquitous rhodopsin motifs of TMs 2, 3, 6 and 7; Acetylcholine, NPF, 5-HT,  
1262 Octopamine: Amino acids extracted from alignment of *F. hepatica* rhodopsins with  
1263 mutationally or structurally-characterised GPCRs (comparators). Summary: Percent  
1264 identity of ACh, NPF, 5-HT and Oct receptor LBDs, indicating most conserved LBD  
1265 sequences showing at least 75% identity.

1266

1267 **S5 Fig. Phylogenetic comparison of *Fasciola hepatica* GPCRs with**  
1268 **deorphanised bilaterian GPCRs.** (A) Peptide receptors (*F. hepatica* black or  
1269 magenta as described in Fig x); (B) Amine receptors (*F. hepatica* dark blue); In all  
1270 cases, non-flatworm receptors are coloured light blue. In (A) outer labels indicate  
1271 positions of receptors for neuropeptide families previously reported in flatworms  
1272 (McVeigh et al., 2009; Collins et al., 2010; Koziol et al., 2016); in (B), outer labels  
1273 represent major groups containing phylogenetically similar *F. hepatica* sequences.  
1274 Trees were midpoint rooted, maximum likelihood phylogenies of transmembrane  
1275 domains I-VII. Numbers at nodes indicate statistical support from approximate  
1276 likelihood ratio test (aLRT). Scale bars at the centre of each tree indicate number of  
1277 substitutions per site. Abbreviations: ACh, acetylcholine; CCAP, crustacean  
1278 cardioactive peptide; Dop, dopamine; FLP, FMRFamide-like peptide; GrH,  
1279 gonadotropin-releasing hormone; Luq, luqin; Mmd, myomodulin; NKY, neuropeptide  
1280 KY; NPF/Y, neuropeptide F/Y; Oct, octopamine; PK, pyrokinin; SIFa, SIFamide; Tyr,  
1281 tyramine; SmGPR, schistosome GPCRs; 5HT, 5-hydroxytryptamine.

1282

1283 **S6 Table. Frizzled receptor ligand binding domain motifs.** Amino acids  
1284 extracted from alignment of *F. hepatica* frizzled and smoothed GPCRs with  
1285 mutationally characterised mouse fz8, also showing positionally-conserved residues  
1286 in mouse fz1-10 (top panel) and *F. hepatica* frizzled receptors. Numbering in top row  
1287 relative to mouse fz8 (Janda et al., 2012). Green boxes indicate identical residues in  
1288 *F. hepatica* vs mammalian Fzd.

1289

1290 **S7 Figure: Adhesion receptor phylogeny.** Maximum likelihood phylogeny of  
1291 *Fasciola hepatica* adhesion/secretin-like GPCRs alongside class B GPCRs from  
1292 human and *Schistosoma mansoni*. Tree was a midpoint rooted, maximum likelihood  
1293 phylogeny of transmembrane domains I-VII. Numbers at nodes indicate statistical

1294 support from approximate likelihood ratio test (aLRT). Scale bars at the centre of  
1295 each tree indicate number of substitutions per site.  
1296

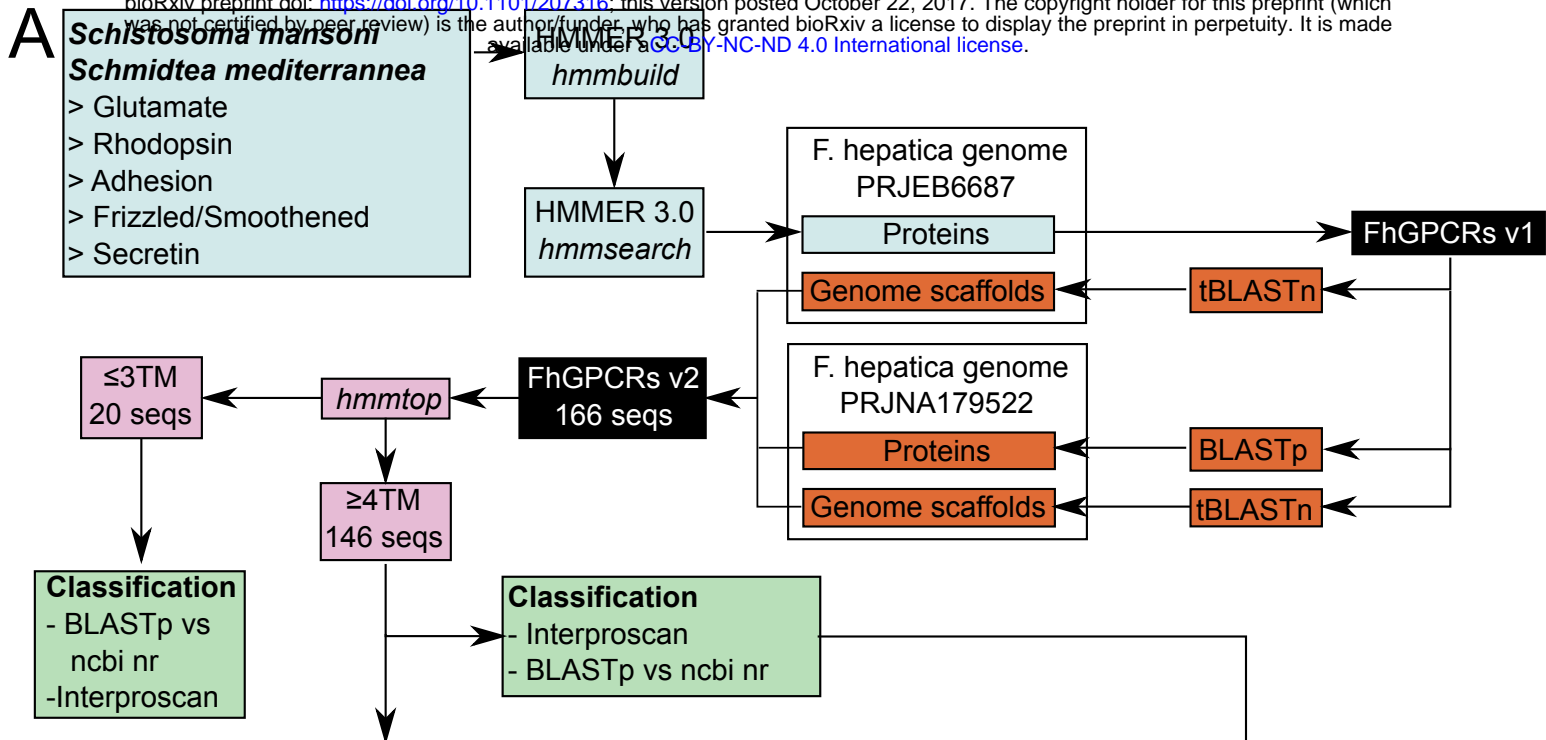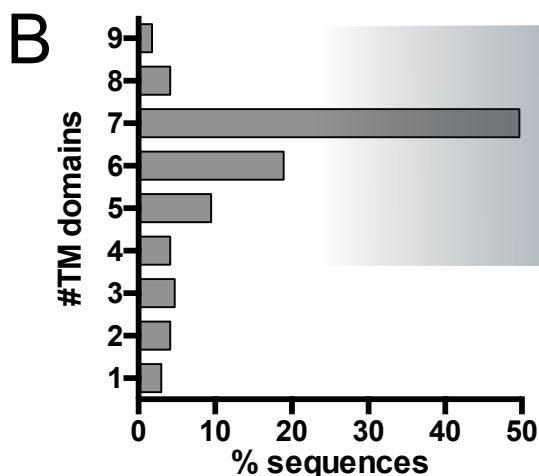

**C**

**4-9TM dataset summary**

146 GPCRs

|            |   |     |
|------------|---|-----|
| Glutamate  | = | 3   |
| Adhesion   | = | 2   |
| Frizzled   | = | 5   |
| Smoothened | = | 1   |
| Rhodopsin  | = | 135 |

**Rhodopsin subclassification (Figure 2)**

RP: E<0.01 non-FW peptide GPCRs  
 RA: E<0.01 non-FW amine GPCRs  
 RO: E<0.01 non-FWopsin GPCRs  
 R: E≥0.01 nonFW sequences

**D**

- > **FhRhodopsins BLASTp vs ncbi nr:**
  - Non-flatworms
  - Basal Phyla (Cnidaria, Ctenophora, Placozoa, Porifera)
  - Lophotrochozoa
  - Ecdysozoa
  - Deuterostomia
  - Phylum Platyhelminthes
- > **Maximum Likelihood Phylogeny**
  - vs Deorphanised Bilaterian Rhodopsins
- > **Ubiquitous rhodopsin motif conservation**
  - TMs 2,3,6,7
- > **Ligand binding domain conservation**
  - vs structurally characterised GPCRs

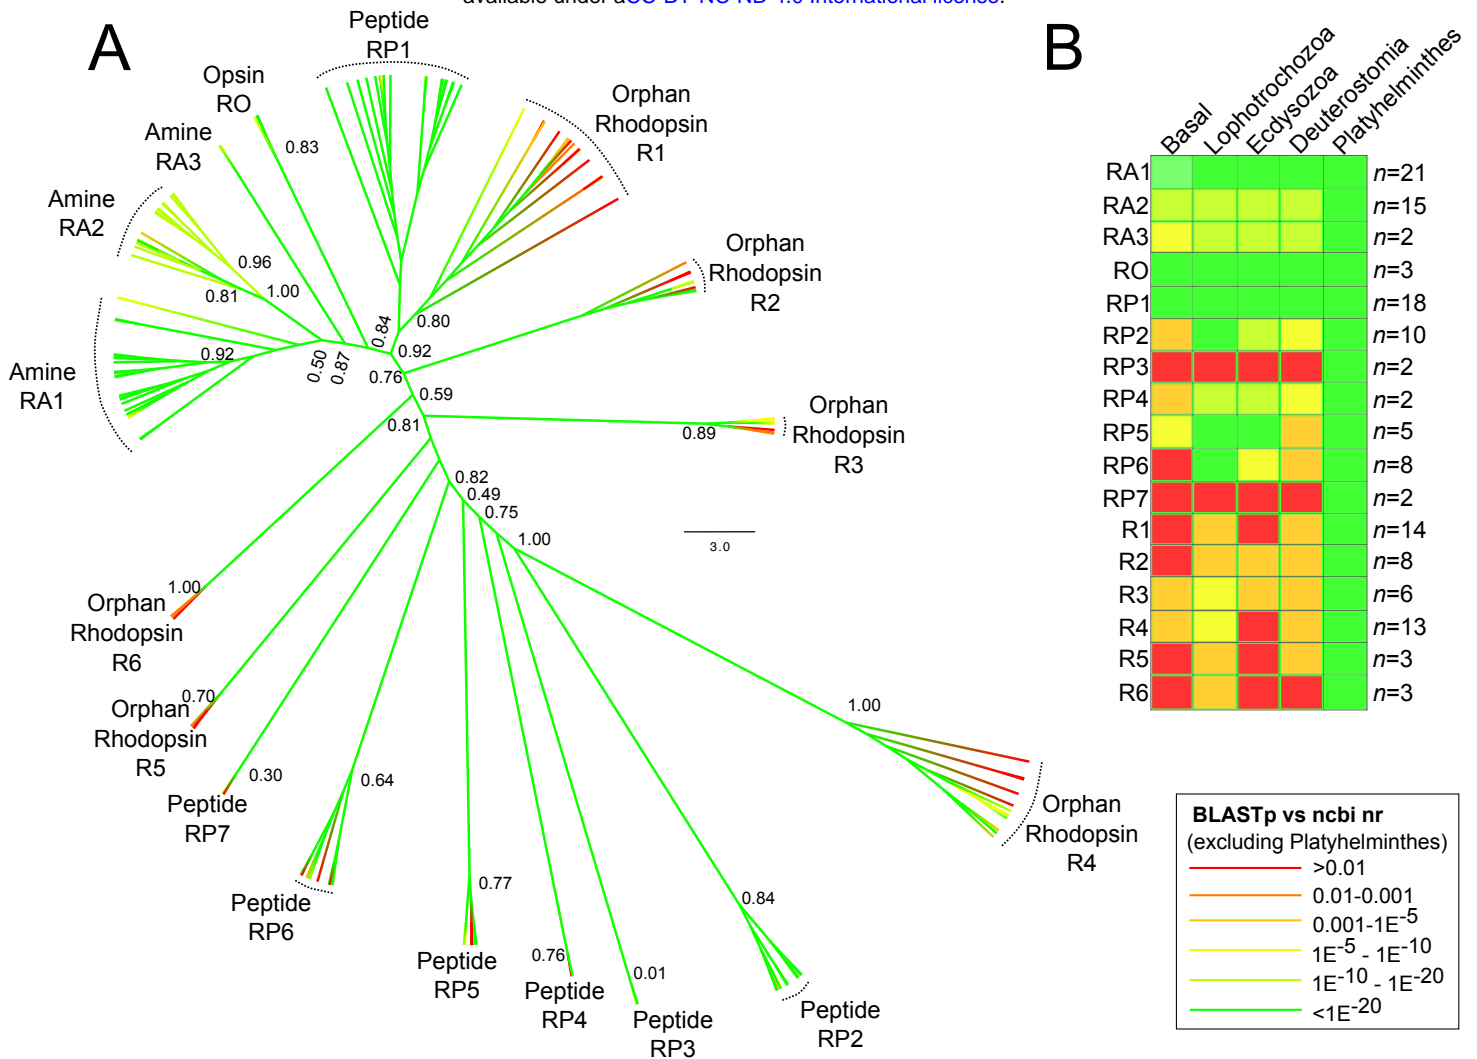

**C**

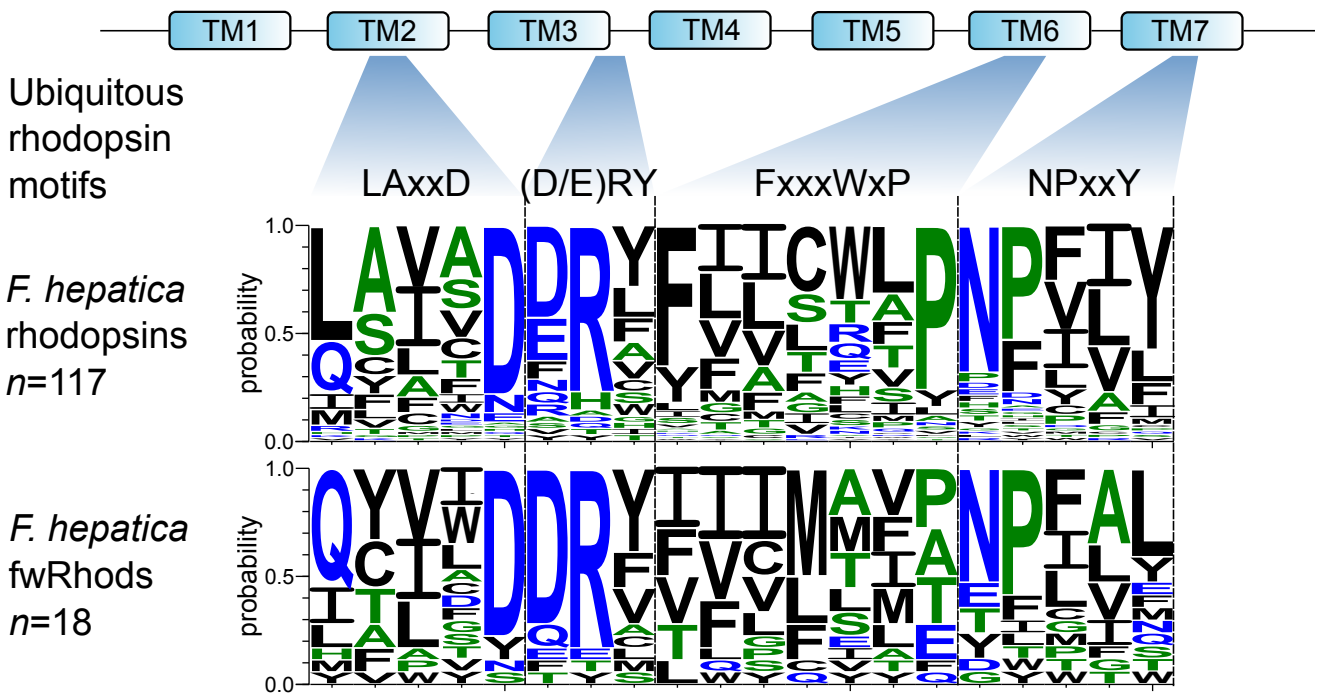



**A**

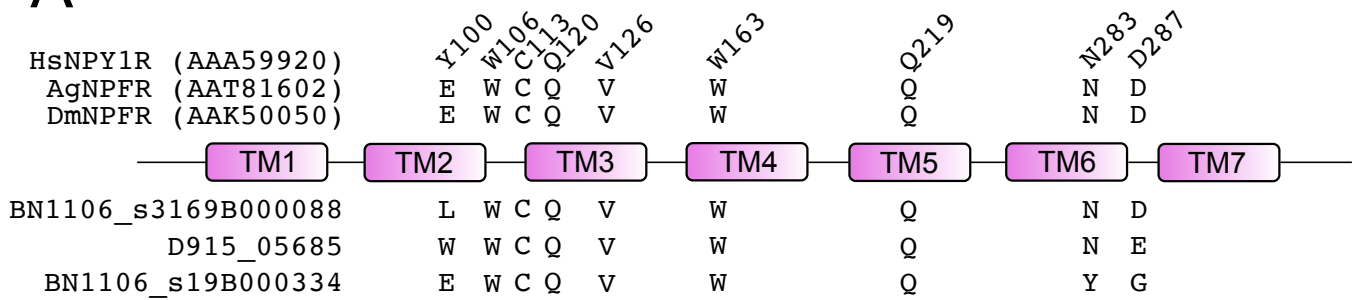

**B**

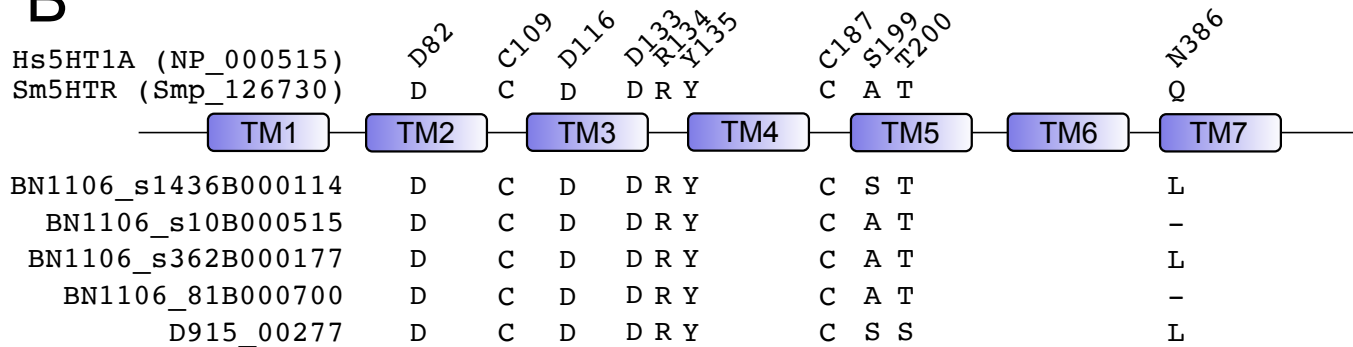

**C**

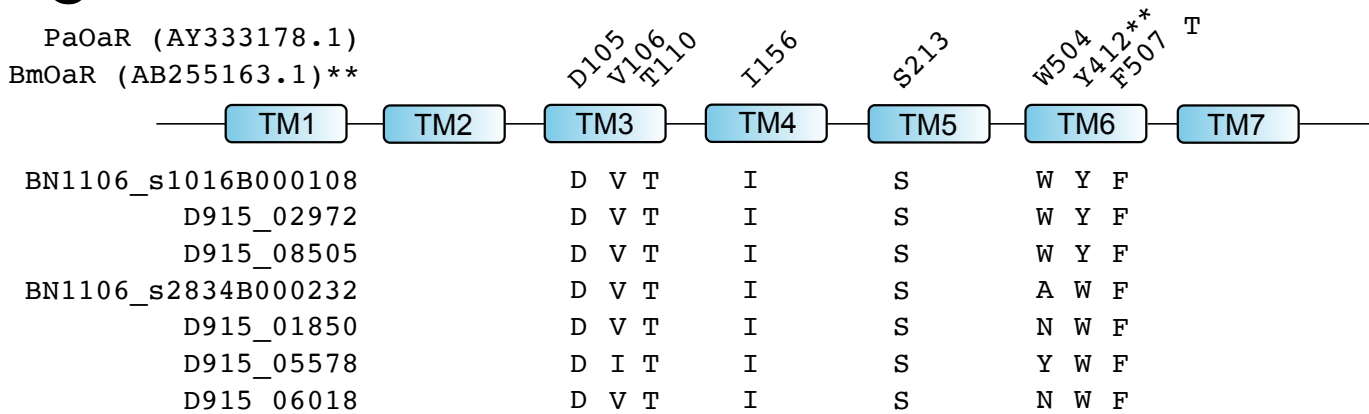

**D**

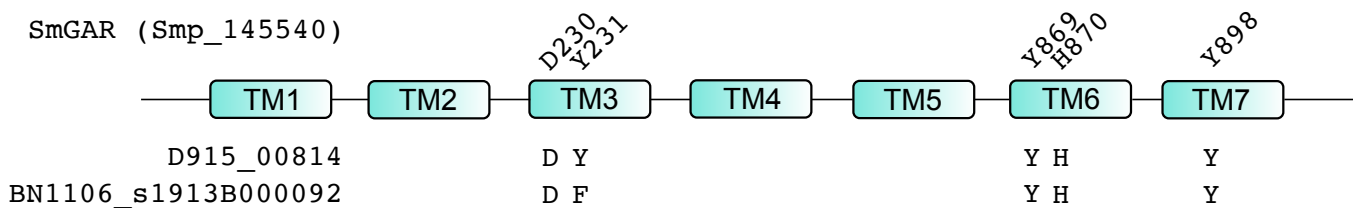

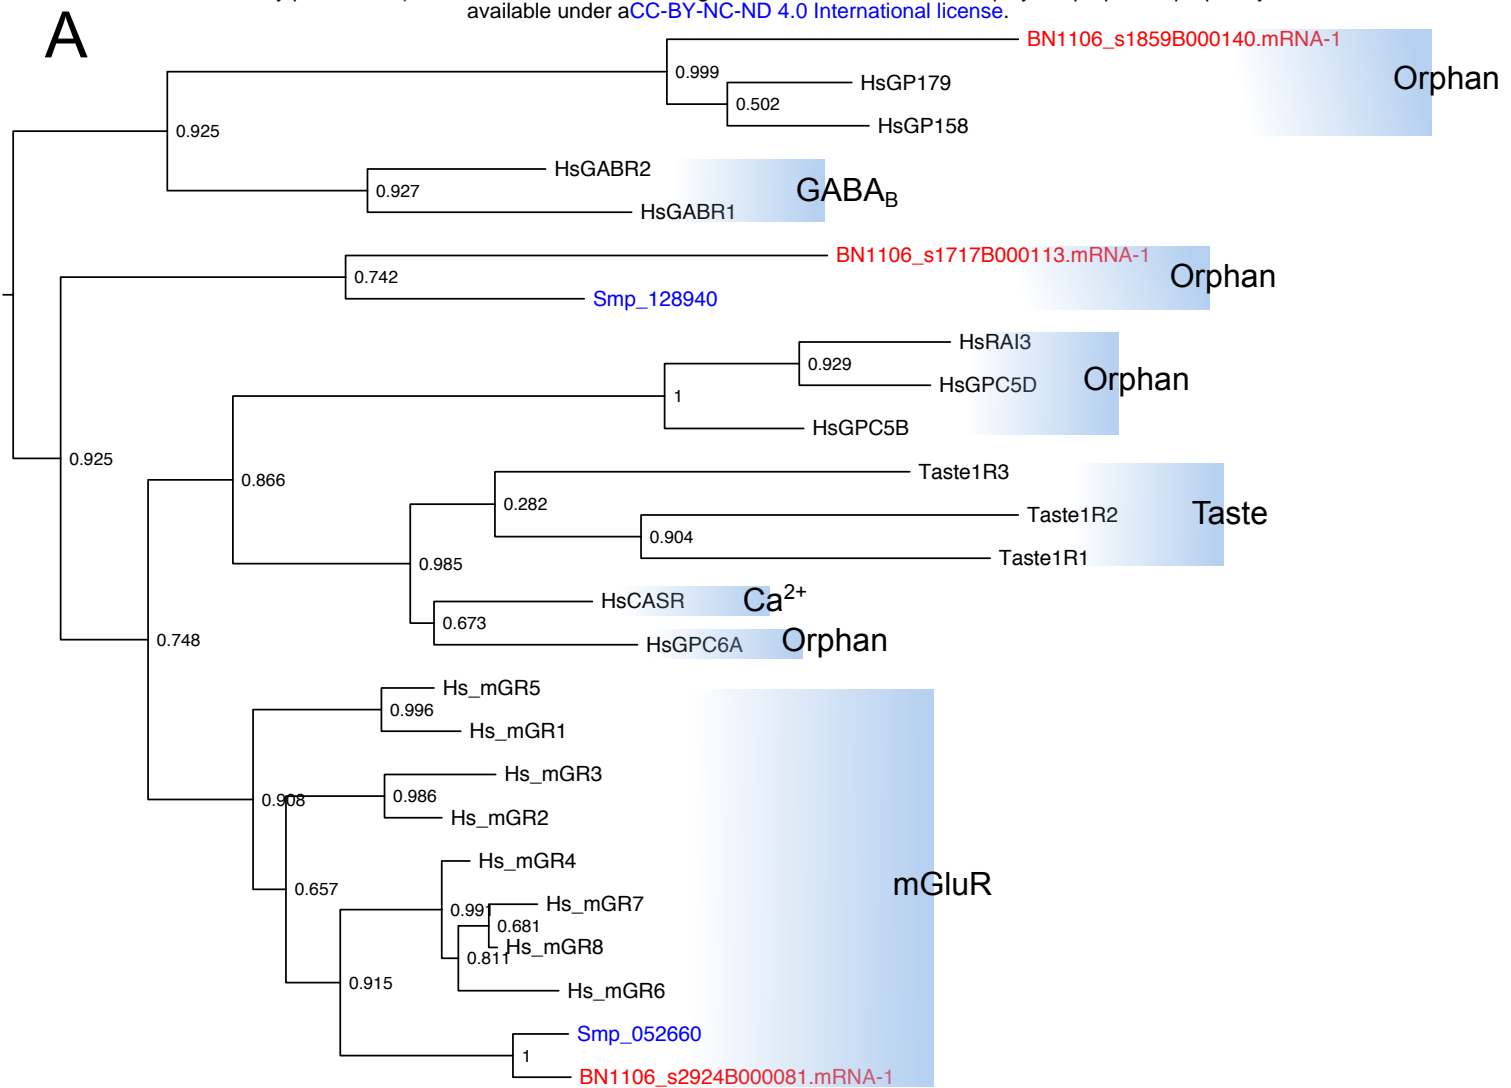

**B**

0.3

| MmGABA <sub>B1</sub> | S246     | S269 | S270     | E465     | D471     |
|----------------------|----------|------|----------|----------|----------|
| BN1106_s2924B000081  | -        | -    | -        | -        | -        |
| BN1106_s1717B000113  | <b>S</b> | D    | A        | <b>D</b> | <b>N</b> |
| BN1106_s1859B000140  | F        | L    | N        | C        | Y        |
| Smp_128940           | <b>S</b> | A    | <b>S</b> | <b>D</b> | <b>N</b> |
| Smp_052660           | <b>S</b> | T    | T        | <b>E</b> | <b>D</b> |

  

| Glu binding region: | COOH     | αNH <sub>2</sub> | αNH <sub>2</sub> | αNH <sub>2</sub> | αNH <sub>2</sub> | αNH <sub>2</sub> | αNH <sub>2</sub> | αNH <sub>2</sub> | αNH <sub>2</sub> | COOH     |          |          |
|---------------------|----------|------------------|------------------|------------------|------------------|------------------|------------------|------------------|------------------|----------|----------|----------|
| mGluR1              | Y74      | R78              | S                | <b>S165</b>      | T188             | D208             | Y236             | E292             | G293             | D318     | D        | K409     |
| mGluR2              | R57      | R                | Y                | <b>S145</b>      | T168             | D188             | Y216             | R                | S                | D295     | R        | K377     |
| mGluR3              | R64      | R68              | Y150             | <b>S151</b>      | T174             | D194             | Y222             | R277             | S                | D301     | Q306     | K        |
| mGluR4              | K74      | R78              | G                | <b>S159</b>      | T182             | D                | Y                | N                | E                | D        | K        | K        |
| mGluR7              | N        | R                | G                | S                | T                | D                | Y                | N                | D                | D        | K        | K        |
| mGluR8              | K71      | R75              | A                | S                | T                | D                | Y                | N                | E                | D309     | K        | K        |
| BN1106_s2924B000081 | -        | -                | -                | -                | -                | -                | -                | -                | -                | -        | -        | -        |
| BN1106_s1717B000113 | I        | F                | I                | <b>S</b>         | D                | A                | <b>Y</b>         | S                | <b>S</b>         | <b>N</b> | <b>D</b> | A        |
| BN1106_s1859B000140 | -        | L                | -                | -                | -                | -                | A                | D                | V                | <b>N</b> | -        | P        |
| Smp_128940          | <b>N</b> | L                | Q                | <b>S</b>         | A                | I                | H                | T                | S                | <b>N</b> | T        | S        |
| Smp_052660          | <b>R</b> | <b>R</b>         | <b>Y</b>         | <b>S</b>         | <b>T</b>         | <b>D</b>         | <b>Y</b>         | G                | M                | <b>D</b> | <b>E</b> | <b>K</b> |





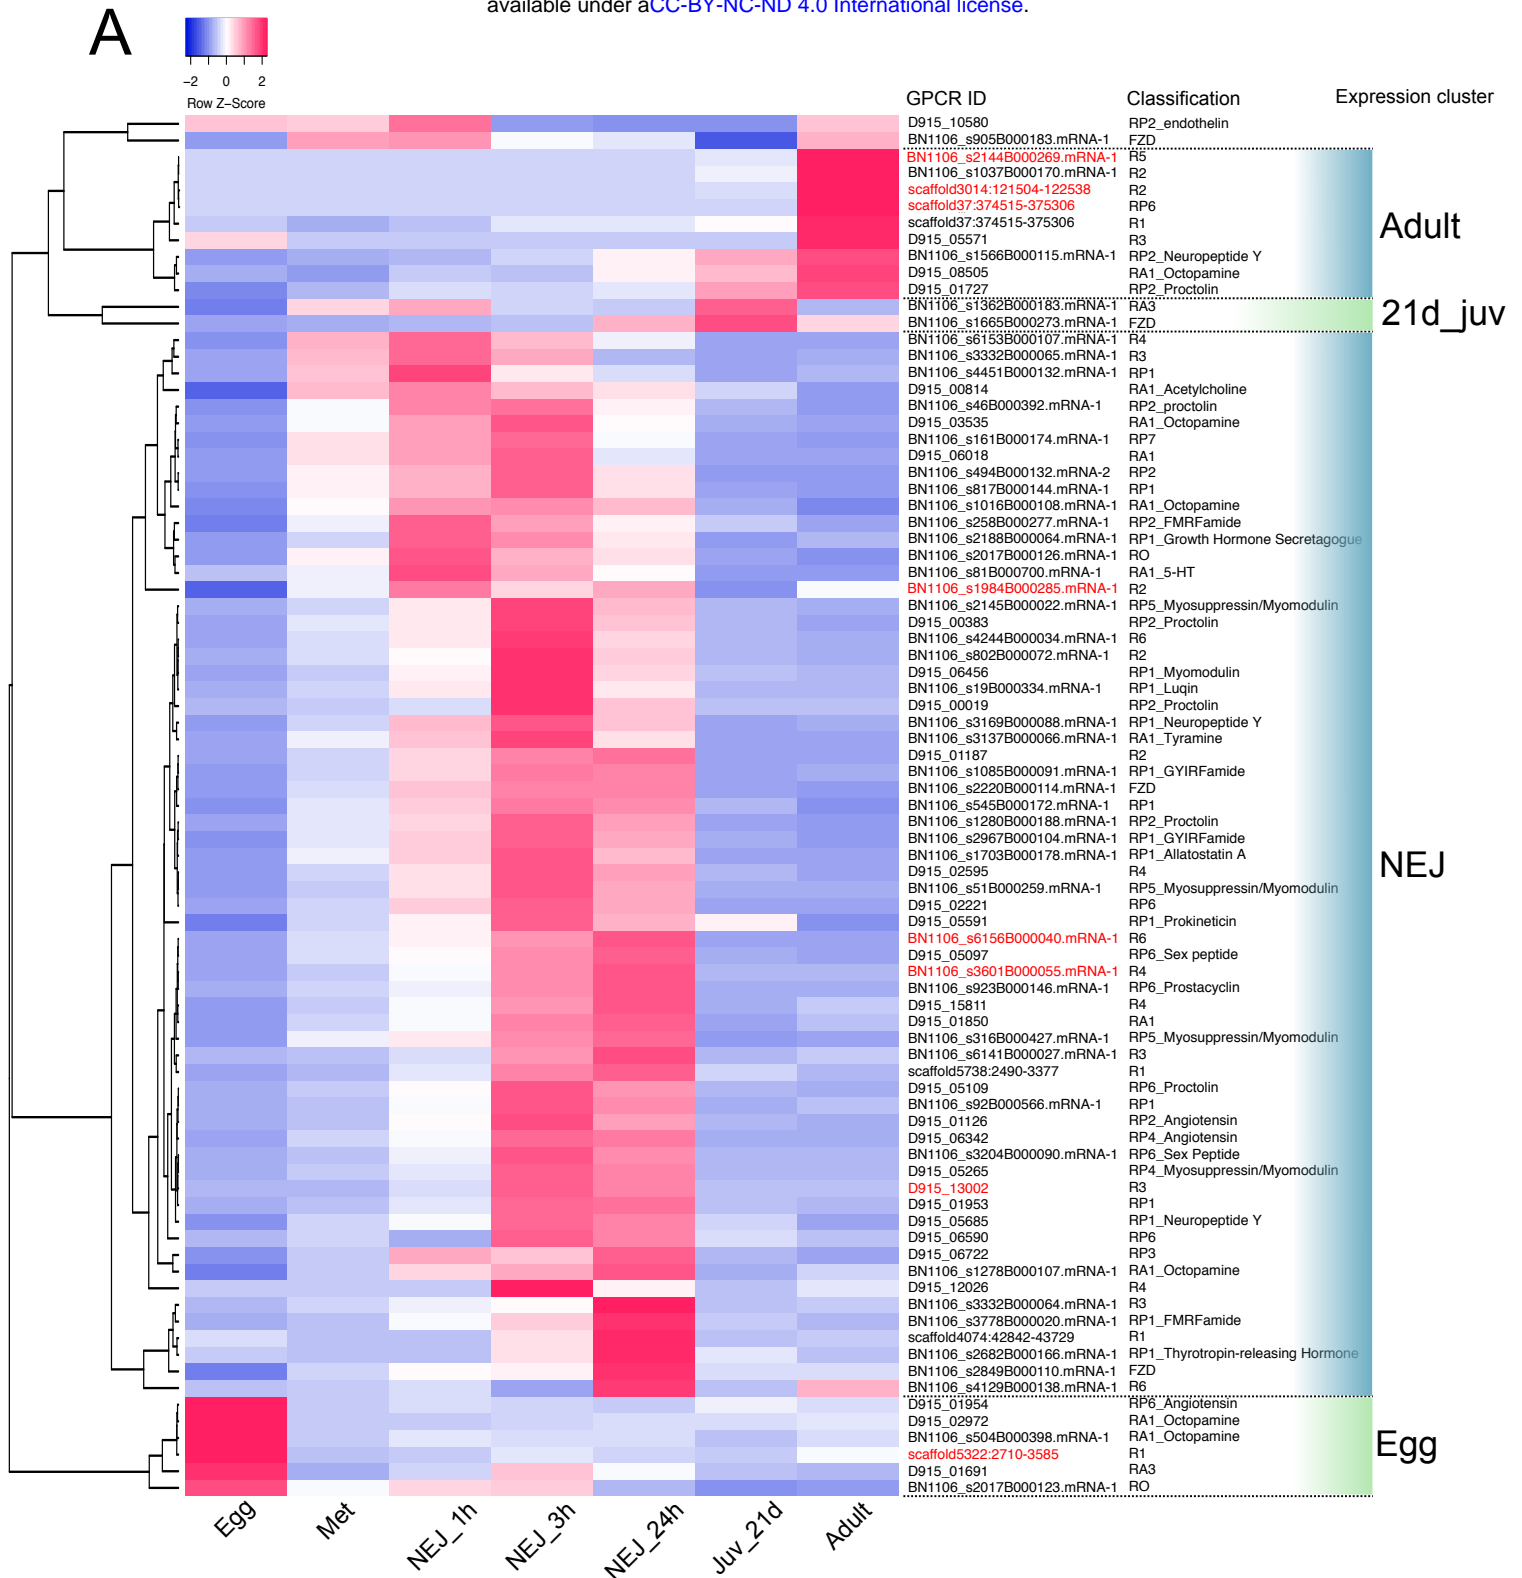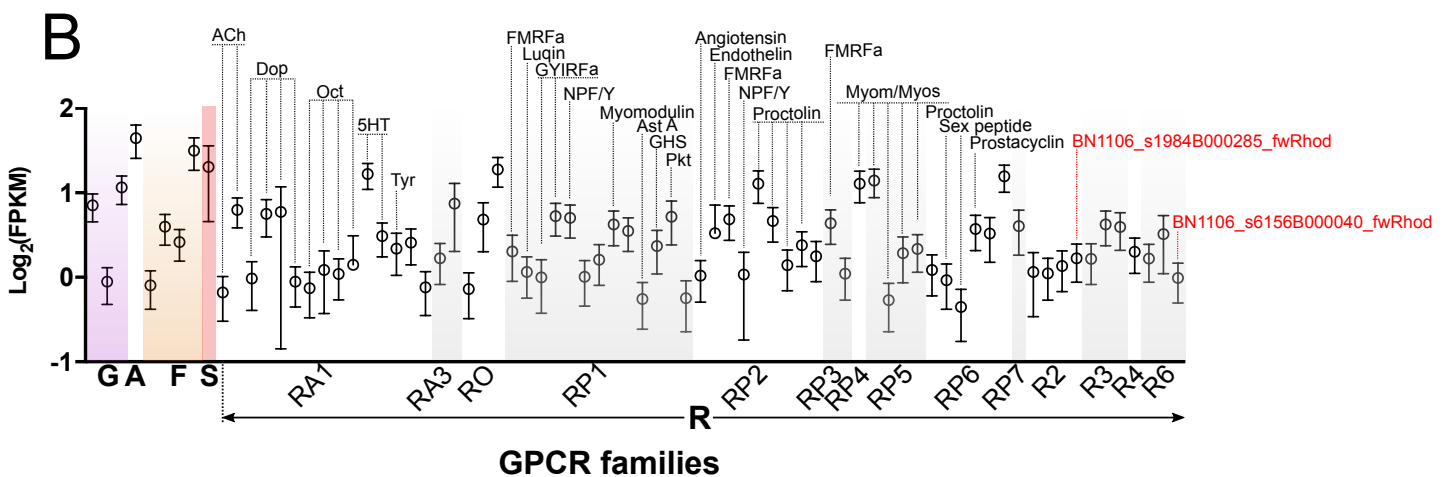

Source: https://www.biorxiv.org/content/10.1101/207316v1.full.pdf
